# Supplementary material
Source: PubMed Central journal article supplement (PMC5531425)
Supplement: jci-127-89756-s001.pdf [file jci-127-89756-s001.pdf]

## **Supplemental materials and methods.**

### *Flow cytometry( details) :*

For surface staining, cells were stained with various markers (supplemental table S1) at room temperature for 15 minutes, washed with PBS and then re-suspended in PBS containing 1:200 dilution of LIVE/DEAD® Fixable Near-IR stain. Cells were then incubate for 15 minutes under room temperature and were fixed with 1.5% formaldehyde for 20 minutes under room temperature, washed one time and resuspended in FACS buffer ( PBS with 5% fetal calf serum) before analysis on flow cytometer.

For intracellular cytokine staining, PBMC were stimulated with PMA (25ng/ml, Sigma-Aldrich) and Ionomycin (500ng/ml, Sigma-Aldrich) in the presence of monensin (2mM; eBioscience) for 5 hours, or as described below under B10/B10 Pro conditions. Cells were then harvested and were stained with surface markers and then LIVE/DEAD® Fixable Near-IR stain (Thermo Fisher Scientific) as described above, with the exception that monensin was added to all the staining buffers. Cells were then fixed with 1.5% formaldehyde for 20 minutes under room temperature, and were then washed twice with permeablization buffer (FACS buffer containing 0.25% Saponin, from Sigma-Aldrich), stained with appropriate cytokine antibodies( supplemental table 1), washed again with permeablization buffer, and were then analyzed by flow cytometer.

For intracellular/intranuclear staining of Foxp3 and CTLA4, cells were first stained with surface marker and then labeled with LIVE/DEAD® Fixable Near-IR stain (Thermo Fisher Scientific) as described above. Cells were then fixed/permeablized using the Foxp3 / Transcription Factor Staining Buffer Set (eBioscience) according to manufacturer's protocol and were stained with Foxp3 and Foxp3 antibodies (supplemental table S1).

All the samples were analyzed using Beckman Coulter Gallios™ Flow Cytometer, which can detect up to 10 different fluorochrome conjugated antibodies simultaneously.

#### Analysis of IL-10 production by CLL cells.

PBMC cells were resuspended ( $2 \times 10^6$  cells/mL) in Iscove's Modified Dulbecco's Media (IMDM) containing 10% fetal bovine serum (FBS), 200 µg/mL penicillin, 200 U/mL streptomycin, and 4mM L-glutamine (all from Gibco™ Thermo Fisher ) and stimulated with CpG (ODN 2006, 10 µg/mL; Invivogen), CD40L (1 µg/mL; R&D Systems), PMA (50 ng/mL; Sigma-Aldrich), Ionomycin (1 µg/mL; Sigma-Aldrich), monensin (2mM; eBioscience), as indicated in 48-well flat-bottom plates before staining and flow cytometry analysis. For “B10” condition, cells were stimulated with CpG, PMA and Ionomycin in the presence of monensin for 5 hours. For “B10 Pro” condition, cells were stimulated with CpG/CD40L for 48 hours, with PMA/Ionomycin/ monensin added for the last 5 hours.

After stimulation, cells were stained for surface markers, including CD19, CD5, CD3, CD4, and CD8. PECE-594 labeled CD14, CD11b, CD16, CD56 and CD123 were added as a “dump channel” to gate out corresponding cell types (supplemental table S1). After surface staining, cells were labeled with LIVE/DEAD® Fixable Dead Cell Stains from ThermoFisher before being fixed with 1.5% Formaldehyde. Fixed cells were then permeablized with FACS buffer containing 0.25% Saponin and were stained with IL-10 antibody (supplemental table S1).

#### Activation induced cell death in human T cells. :

T cells were isolated from healthy human donors using EasySep™ Human T Cell Isolation Kit. Isolated T cells were stimulated in vitro with plate bound CD3/CD28 for 3 days. Cells were then rested in complete medium containing 50IU/ml IL-2 for additional 7-11 days before they were treated with vehicle, Ibrutinib or acalabrutinib for 30 minutes. Cells were then plated on to 48 well

plates coated with CD3; incubate for 6 hours (for flow cytometry based apoptosis assay) or 3 hours (to isolate mRNA for qPCR to quantify FAS-L expression.) in the presence of IL2 to induce AICD.

For AICD analysis, cells were stained with annexin-V fitc and Propidium Iodide (PI) using the BD biosciences 10X staining buffer according to the manufacturer's protocol before being analyzed on flow cytometer.

For FAS Ligand mRNA quantification, mRNA were extracted from T cells after 3 hours of re-stimulation using QIAGEN "RNeasy Mini"RNA Isolation Kit. mRNA was then reverse transcribed to cDNA using the M-MLV Reverse Transcriptase from Thermo Fisher. Quantitative PCR for FAS-L were performed using the Taqman probe/primer mix (FAM labeled) from Thermo Fisher using GAPDH as internal control.

#### Activation induced cell death in human NK cells

Human CD56<sup>+</sup>/CD3<sup>-</sup>/14<sup>-</sup>/20<sup>-</sup> NK cells were isolated from peripheral blood leuko-Paks from normal donors (American Red Cross) by incubation with an NK cell RosetteSep negative enrichment cocktail (Stem Cell Technology), followed by Ficoll-Hypaque density gradient centrifugation as previously described(96). NK cells were then sorted to greater than 99% purity with a FACS Aria II cell sorter (BD Biosciences). Purified NK cells were plated at 5x10<sup>4</sup> cells/well in a 96-well round bottom plate and cultured for three days at 37°C. Medium consisted of RPMI 1640 supplemented with 10% fetal bovine serum (FBS), and 1% antibiotic/antimycotic (Life Technologies). The cytokines IL-2 (Peprotech) and IL-15 (National Cancer Institute) were supplemented as indicated for a final concentration of 10ng/mL. IL-12 (Miltényi Biotec) was added where indicated at a concentration of 10ng/mL to induce activation induced cell death.

Cell viability and apoptosis were assessed after three days in culture by annexin V (BD Biosciences) apoptotic and TO-PRO-3 (Molecular Probes) viability flow cytometric analysis(97). NK cells were harvested and stained with annexin V per manufacturer's instructions (BD

Biosciences). TO-PRO-3 was added immediately prior to acquisition, and all samples were analyzed with a LSRII cytometer (BD Biosciences) within one hour of annexin V staining. Analysis of dual staining of annexin V and TO-PRO-3 was analyzed using FlowJo (TreeStar).

Figure S1

A. Patients treated with Ibrutinib

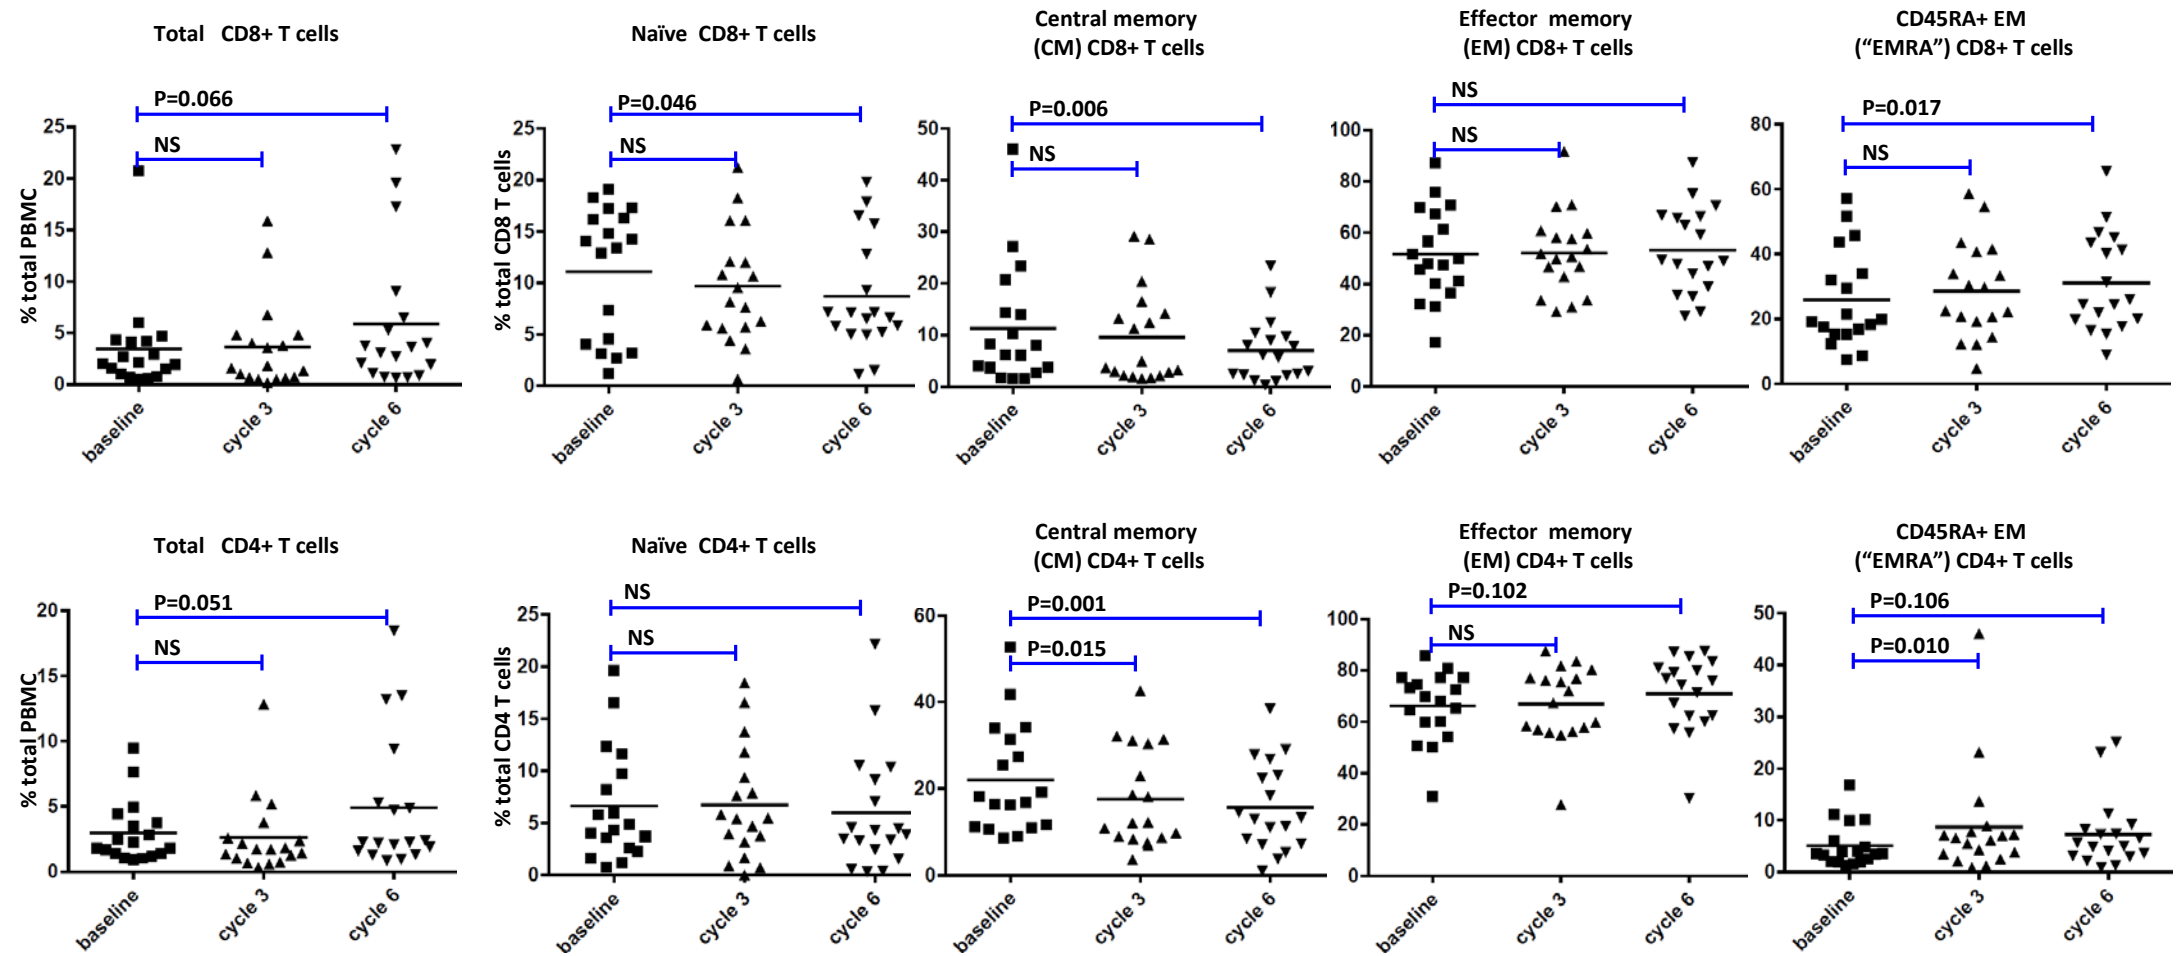

B. Patients treated with acalabrutinib

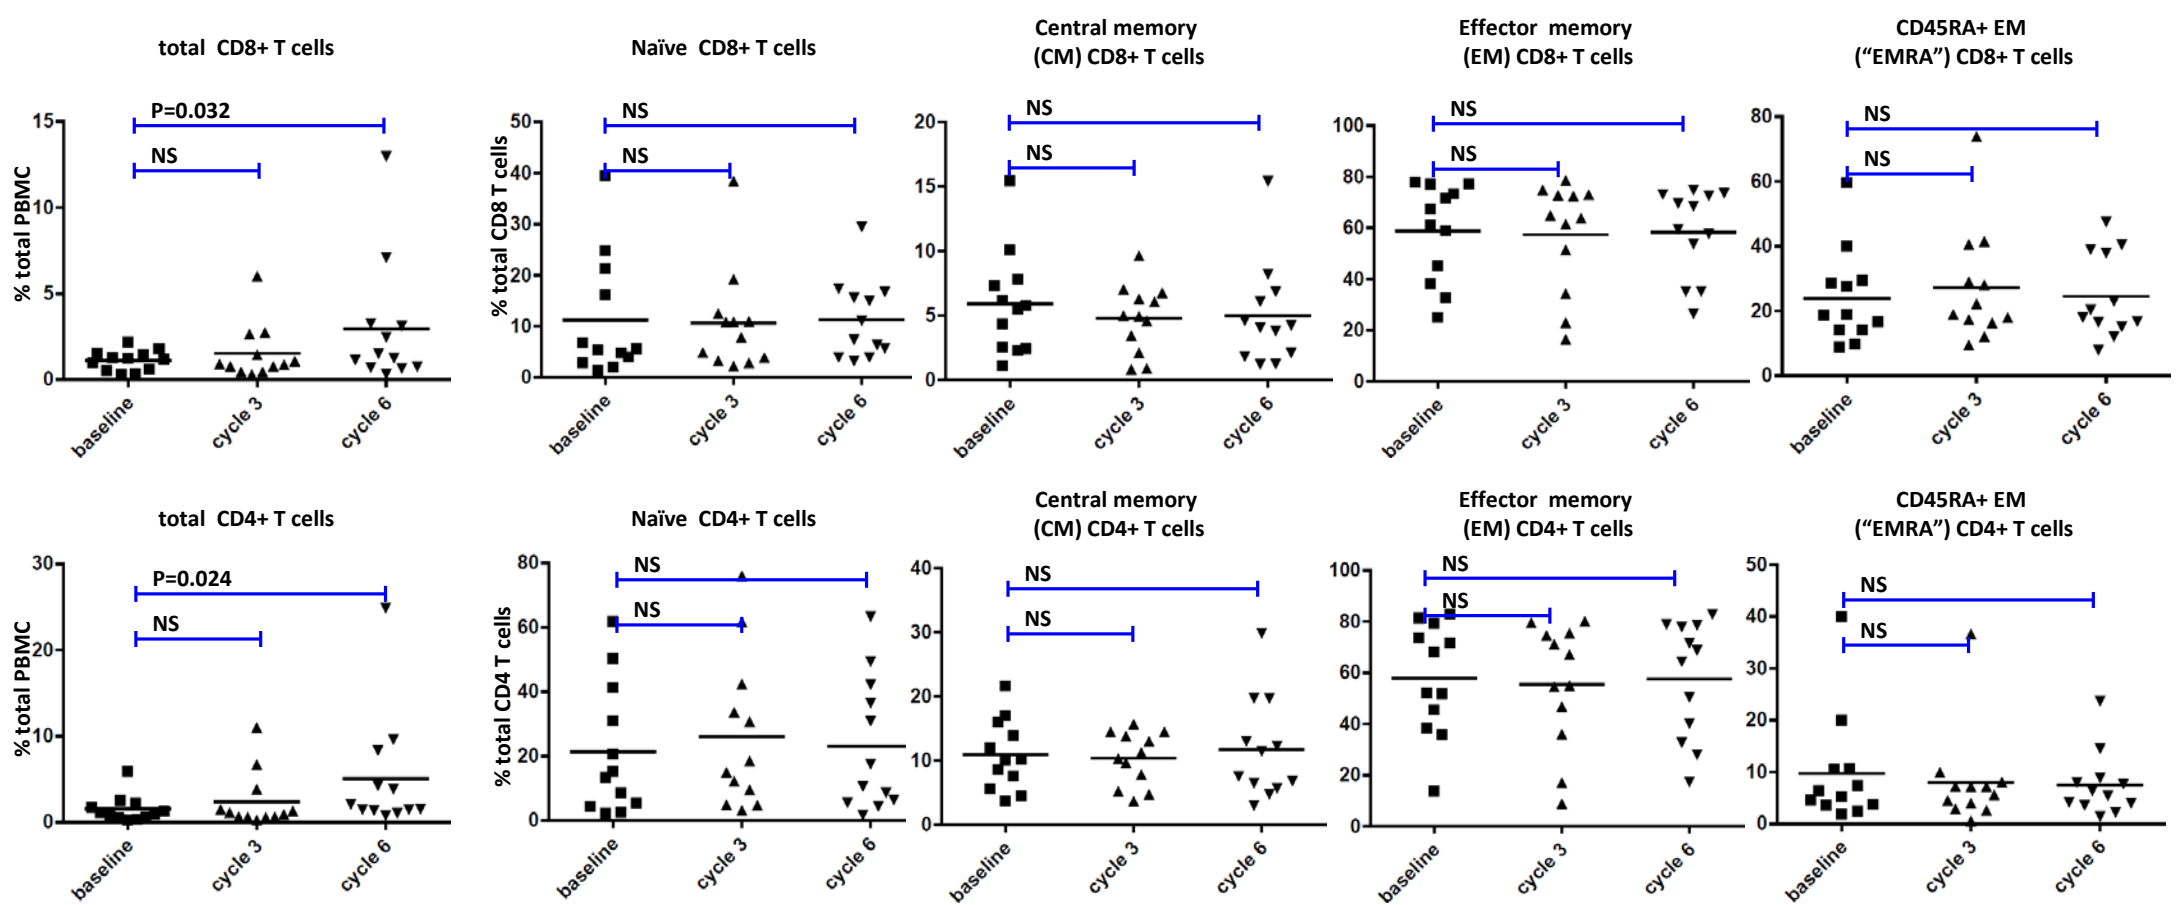

**Figure S1:** The effect of ibrutinib or acalabrutinib treatment on the frequency of different subsets of peripheral T cells. **(A).** Percentage of different T cell subsets among total CD8 T cells( upper panel) and CD4 T cells (lower panel) before and after ibrutinib Treatment (n=18). **(B).** Percentage of different T cell subsets among total CD8 T cells( upper panel) and CD4 T cells (lower panel) before and after acalabrutinib treatment (n=12). T cells are differentiated into subsets based on their expression of CCR7 and CD45RA: naïve T cells (CCR7+CD45RA+), central memory T cells (CCR7+CD45RA-), effector memory T cells (CCR7-CD45RA-), and most differentiated effector memory T cells (T-EMRA, CCR7-CD45RA+).

Figure S2

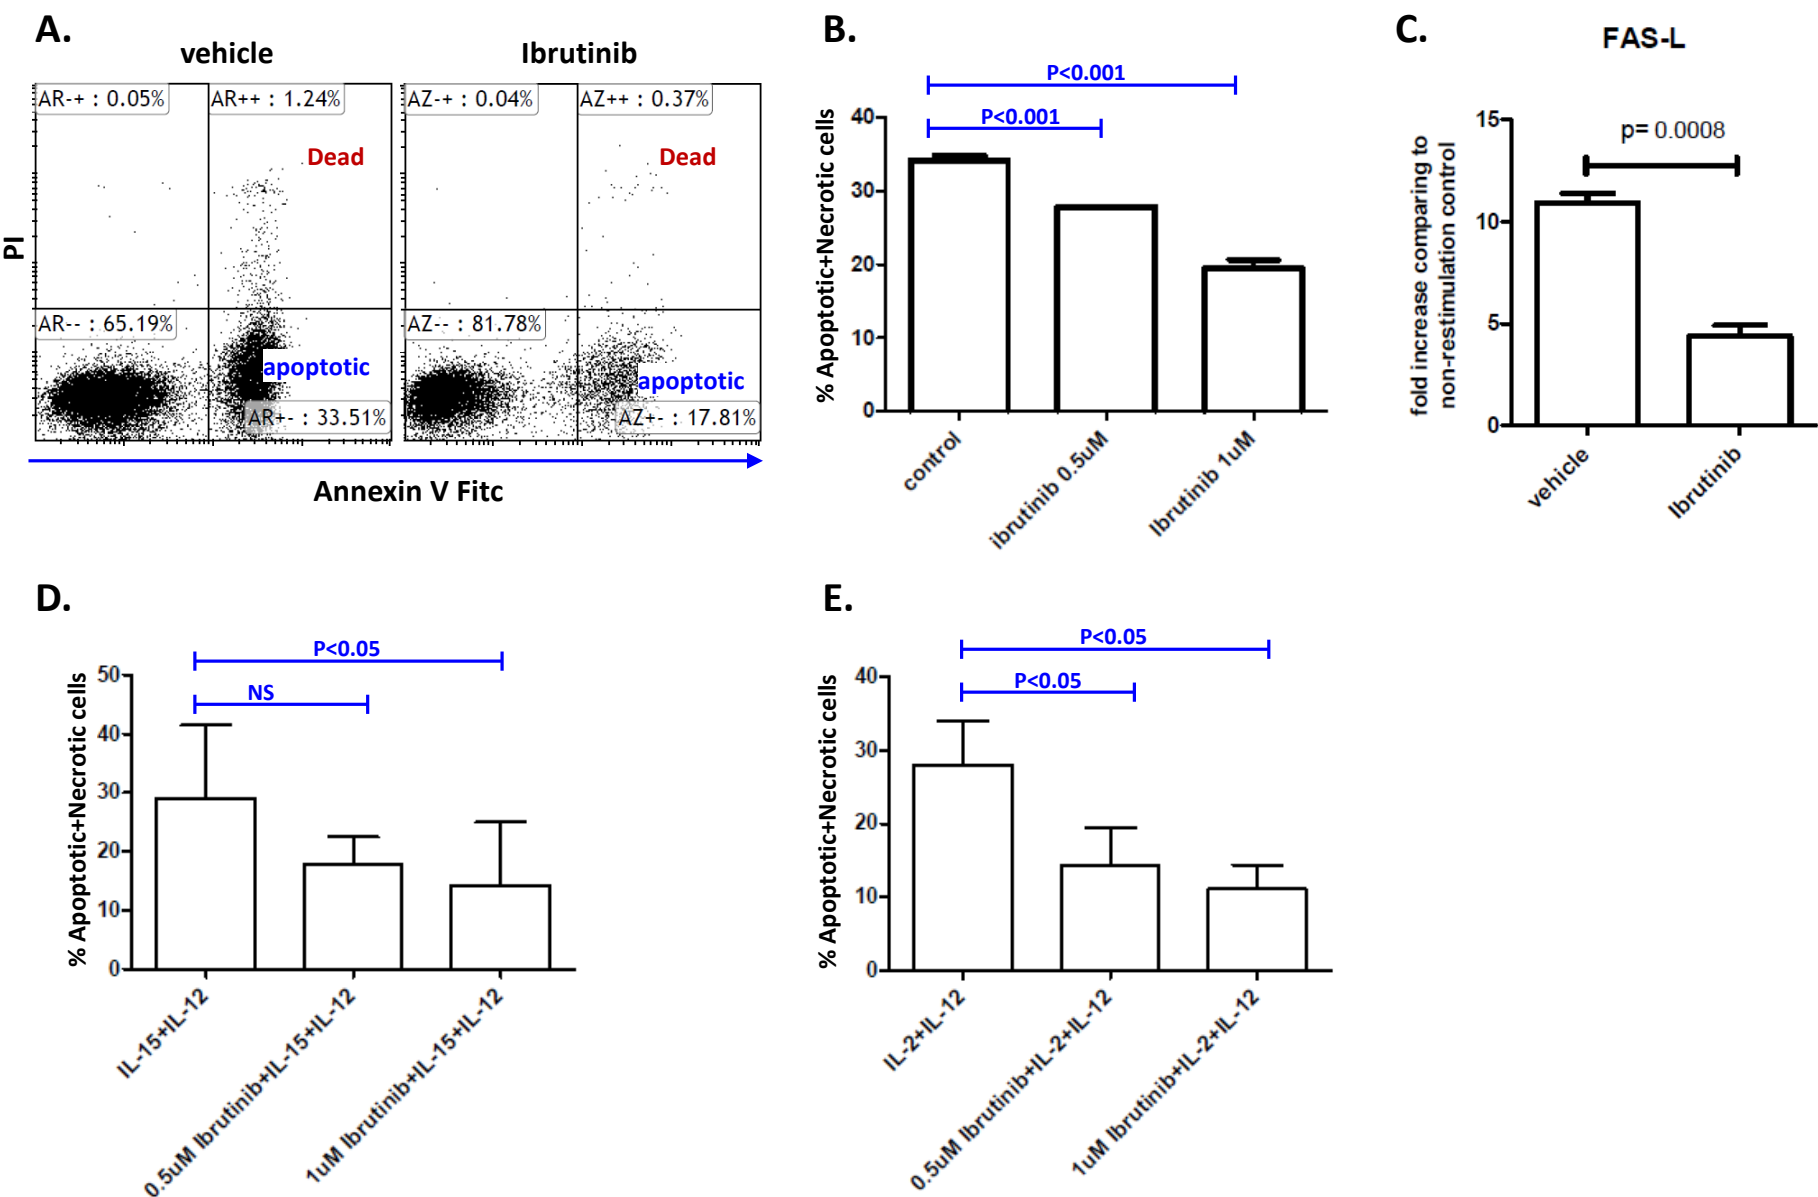

**Figure S2:** Ibrutinib treatment of human T cells or NK cells protects against activation induced cell death in a dose dependent manor. **(A)- (C),** T cells were isolated from healthy human donors blood samples, stimulated in vitro with CD3/CD28 for 3 days, rested in culture medium containing 50 IU IL-2 for 11 days, then were restimulated with plate bound CD3 for 6 hours (as in A. and B.) or 3 hours (as in C.) in the presence of IL2 to induce activation induced cell death in the presence of absence of ibrutinib. Each indicated condition. **(A).** representative FACS dot plots of Annexin V & PI staining. **(B).** Bar graphs that show the percentage of non-viable was done in triplicate. Data shown are representative of three independent experiments (apoptotic + necrotic, as defined by Annexin V positive and PI positive cells) cells after induction of AICD. **(C).** FAS-L mRNA upregulation in activated T cells upon induction of AICD was impaired by ibrutinib treatment. mRNA was isolated from the T cells after induction of AICD, cDNA was synthesized and qPCR for FAS-L and GAPDH was done. Figure A, B and C represent 3 independent experiments. **(D) & (E),** Human CD56<sup>+</sup>/CD3<sup>+</sup>/14<sup>-</sup>/20<sup>-</sup> NK cells were isolated from peripheral blood from normal donors (N=3) by negative enrichment, and were then sorted to greater than 99% purity by FACSaria II sorter. Purified NK cells were plated at 5x10<sup>4</sup> cells/well and were cultured for three days. IL-15 **(D)** and IL-2 **(E)** were added as indicated for a final concentration of 10ng/mL. IL-12 (Miltenyi Biotec) was added where indicated at a concentration of 10ng/mL to induce activation induced cell death. Bar graphs that show the percentage of non-viable (apoptotic + necrotic, as defined by Annexin V positive and TO-PRO-3 positive cells) cells after induction of AICD. (N=3)

Figure S3

A. Patients treated with Ibrutinib

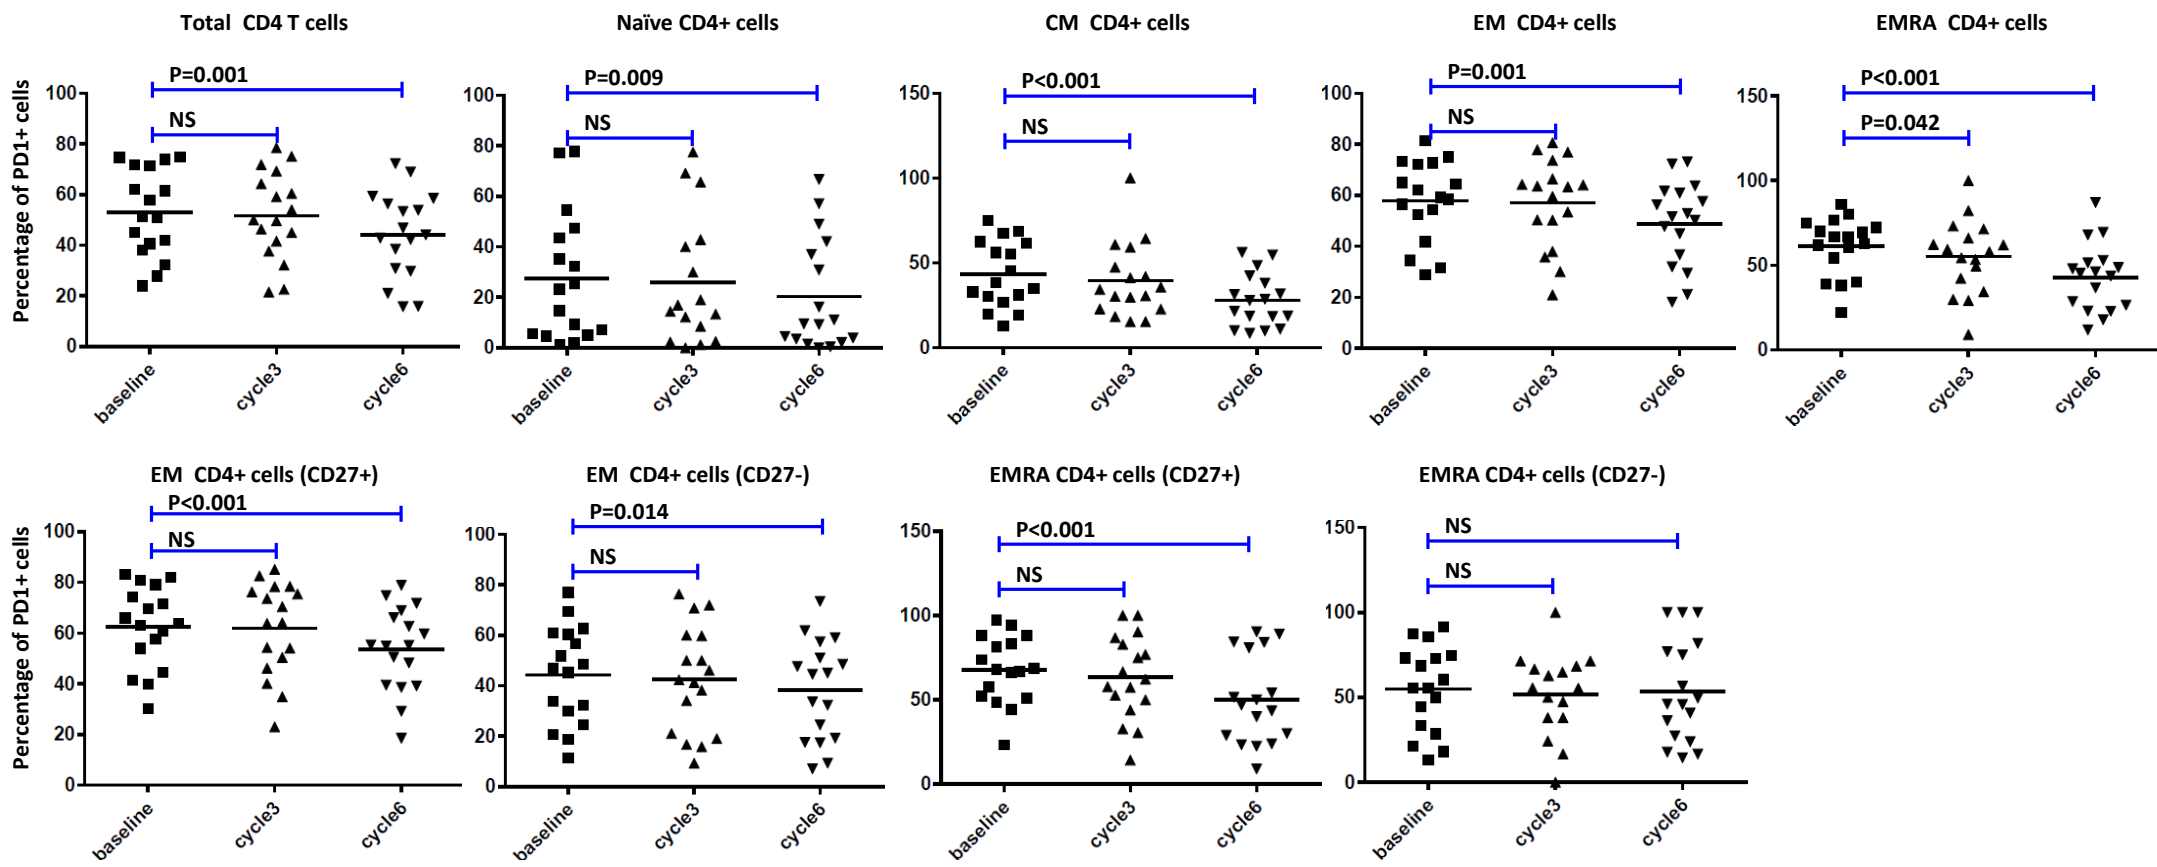

B. Patients treated with acalabrutinib

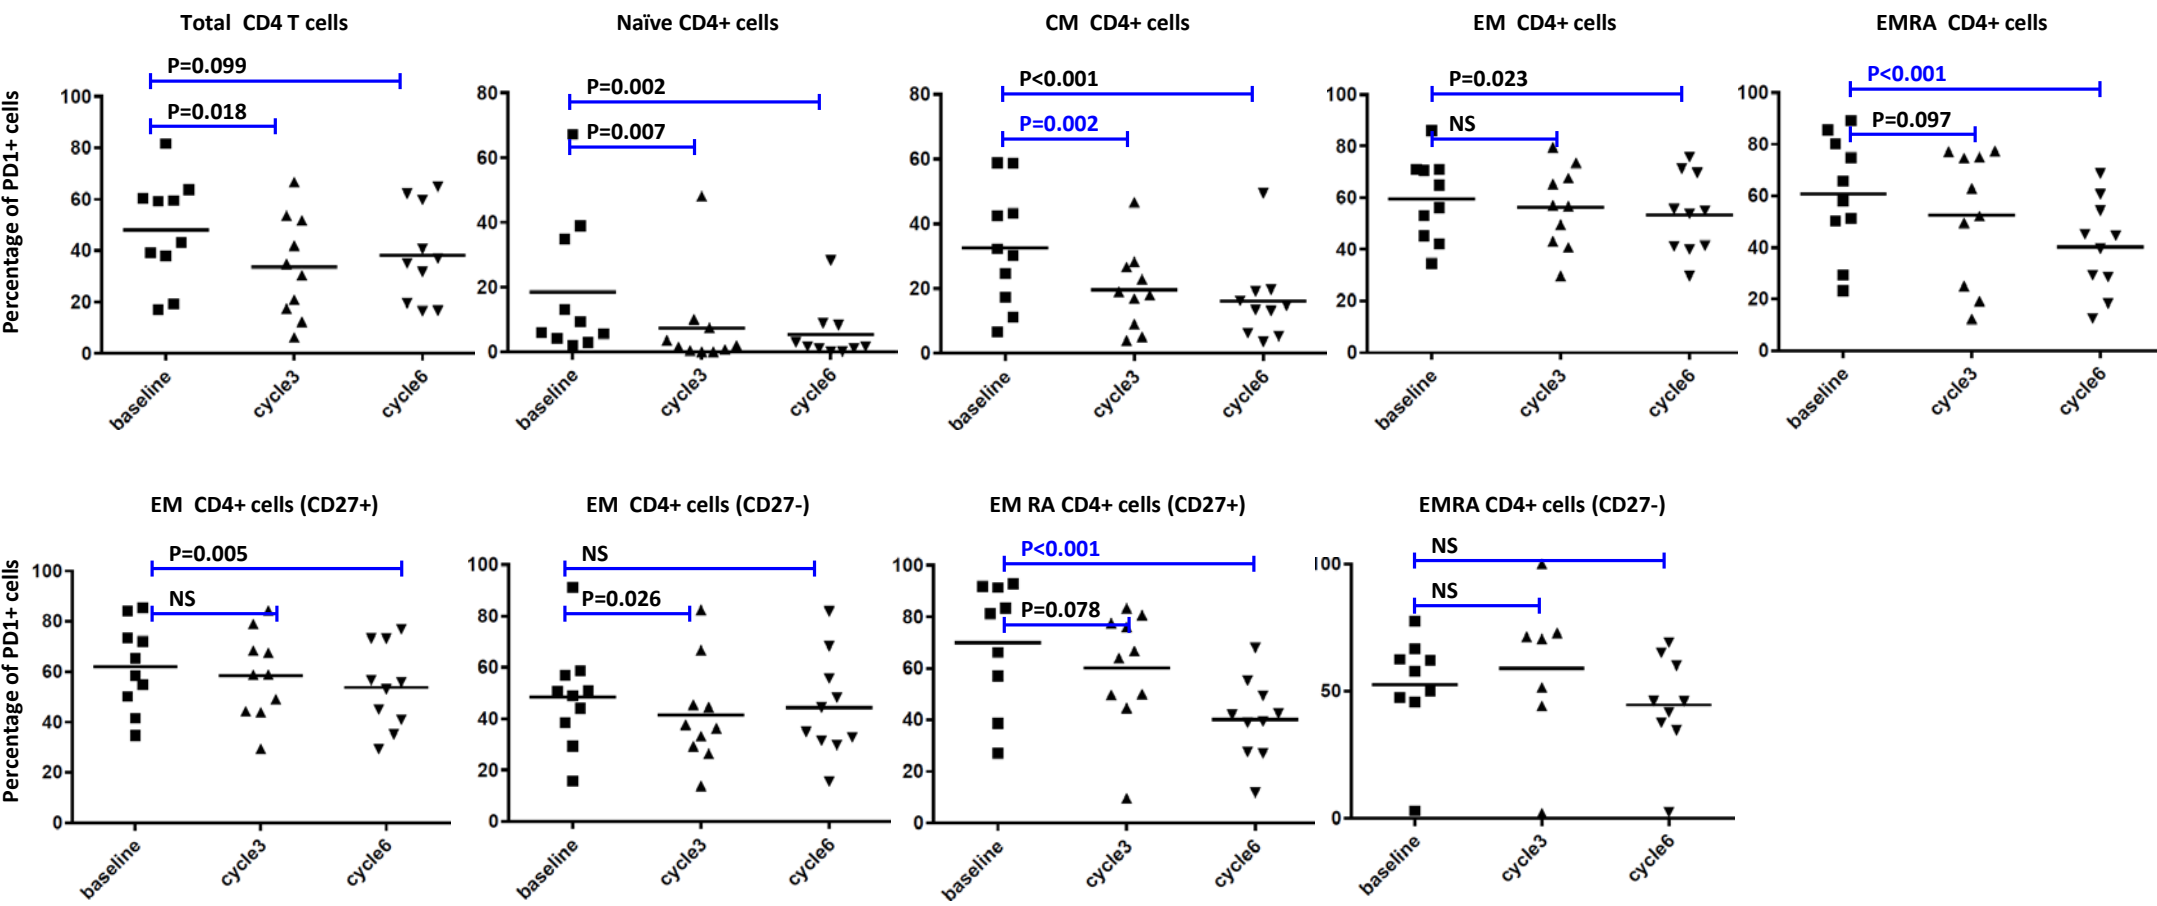

**Figure S3:** Treatment with ibrutinib, as well as with acalabrutinib, leads to a significant reduction in the frequency of PD-1 positive cells in CD4 T cell populations. **(A).** Percentage of PD1 positive cells among different subsets of CD4 T cells from CLL patients before and after ibrutinib treatment. (n=17) **(B).** Percentage of PD1 positive cells among different subsets of CD4 T cells from CLL patients before and after acalabrutinib treatment. (n=10)

Figure S4.

**A.** Patients treated with Ibrutinib

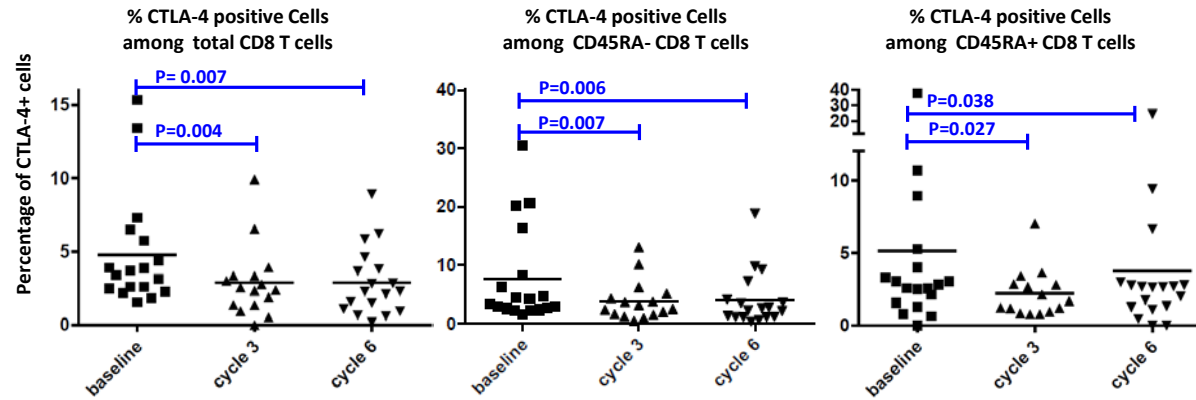

**B.** Patients treated with acalabrutinib

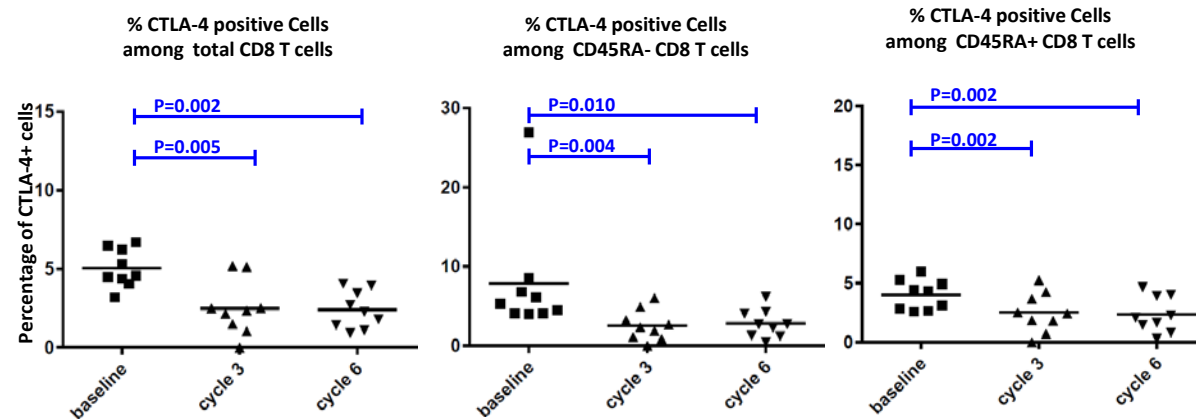

**Figure S4:** Treatment with ibrutinib, as well as with acalabrutinib, leads to a significant reduction in the frequency of intracellular CTLA4 positive cells in CD8 T cell populations. **(A).** Percentage of CTLA4 (intracellular) positive cells among total CD8 T cells, CD45RA- CD8 T cells and CD45RA+ CD8 T cells from CLL patients before and after ibrutinib treatment.(n=18). **(B).**Percentage of CTLA4 (intracellular) positive cells among total CD8 T cells, CD45RA- CD8 T cells and CD45RA+ CD8 T cells from CLL patients before and after acalabrutinib treatment.(n=9).

Figure S5

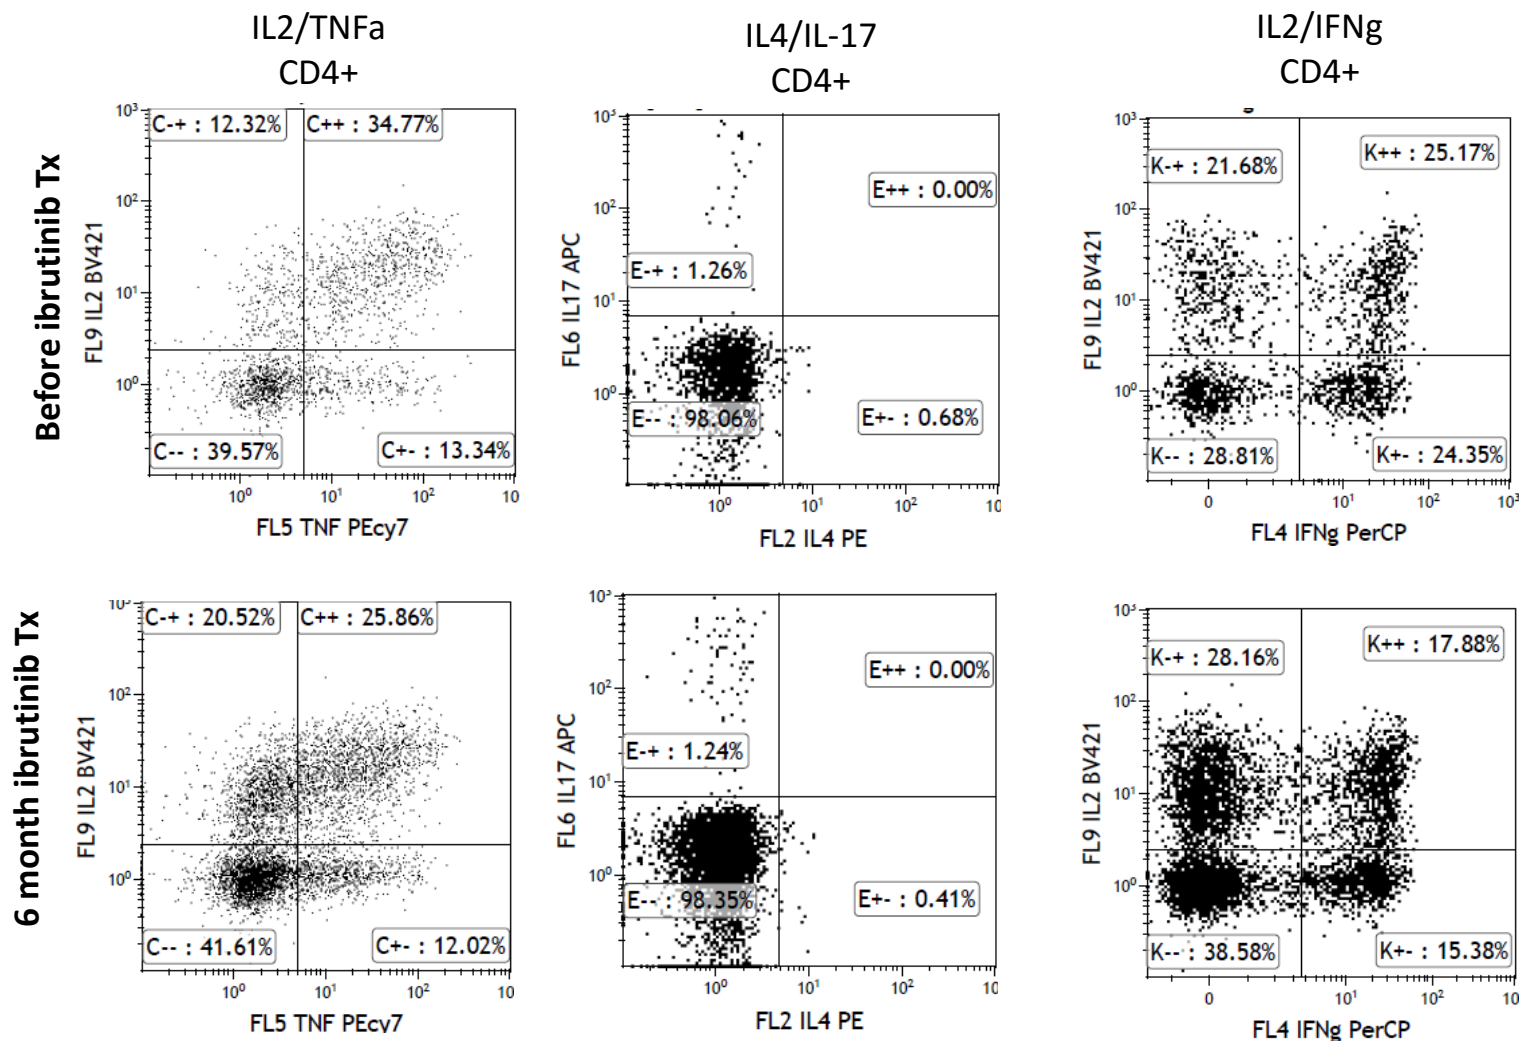

**Figure S5: Representative** FACS plot of intracellular cytokine staining( n=15). PBMC from CLL patient before and after ibrutinib treatment were stimulated with in vitro with PMA/Ionomycin in the presence of Monensin for 5 hours. Cytokine production (IFN $\gamma$ , IL4, IL17, TNF $\alpha$  and IL2) were detected by intracellular cytokine staining.

Figure S6

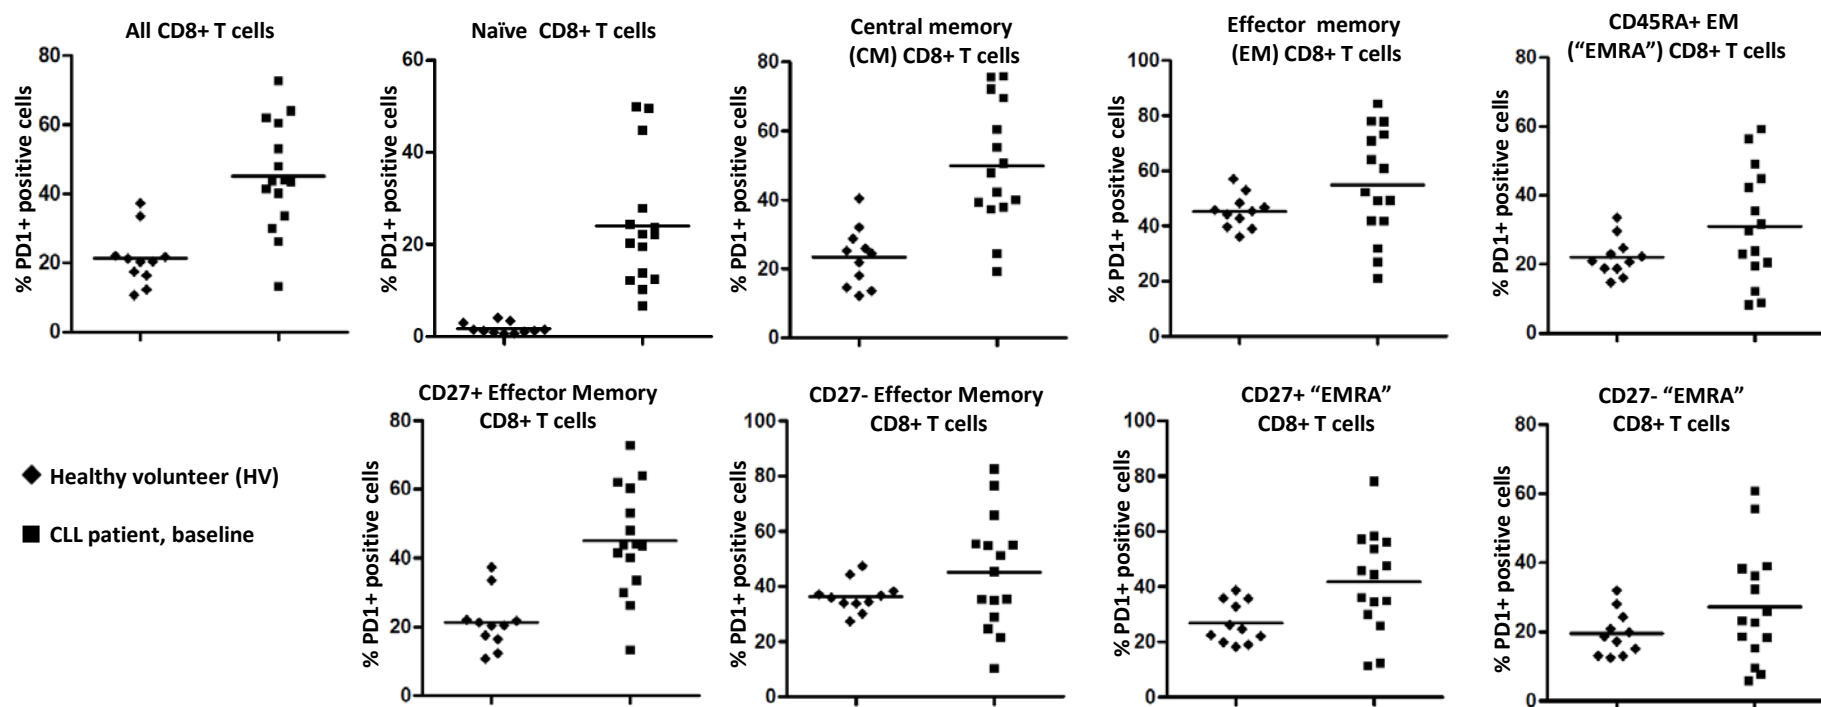

**Figure S6:** PD-1 expression is increased in all of the T cell subsets in CLL patients comparing to healthy donors. The increase is most prominent in naïve and central memory T cell compartment. Frequencies of PD-1 positive cells among different CD8 T cell subsets were shown. n=11 for healthy donor, n=15 for CLL patients.

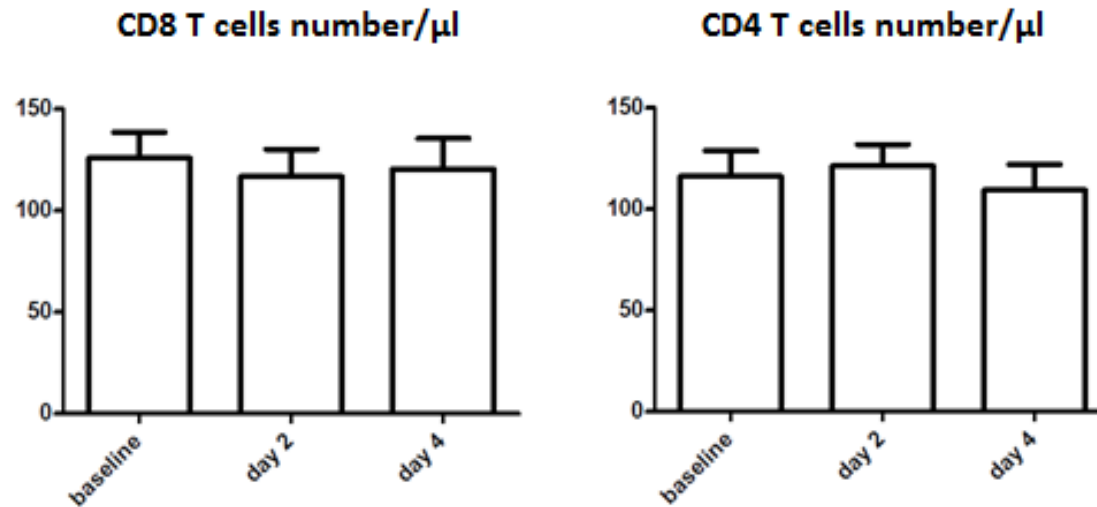

**Figure S7:** Short term Ibrutinib treatment (2 or 4 days) does not increase circulating T cell numbers. Wild type B6 mice were engrafted with CLL cells ( splenocytes from leukemic E $\mu$ -TCL1 transgenic mice). seven weeks post leukemia engraftment, the mice were treated with ibrutinib and the circulating T cell numbers in peripheral blood were monitored before starting ibrutinib, 2 days and 4 days post starting ibrutinib( corresponding to the time when CLL cells numbers were transiently increased in peripheral blood in this model(1)). N=14.

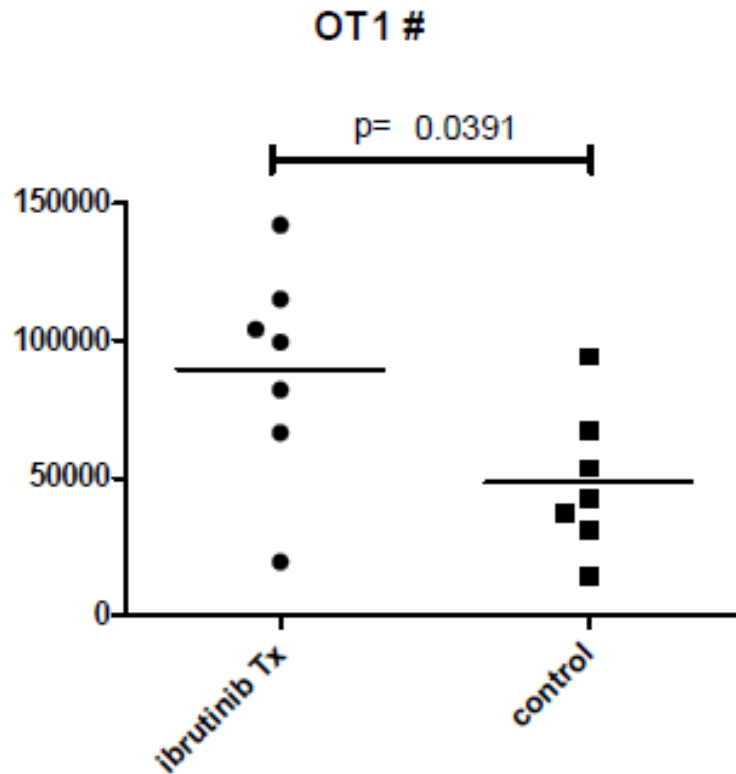

**Figure S8:** Ibrutinib treatment increases the number of activated leukemia specific T cells. Mice were engrafted with AML cell line (C1498) expressing OVA (a model antigen). OT-1 transgenic T cells ( recognize OVA) were then adoptively transferred into AML engrafted mice. The mice were treated with Ibrutinib versus vehicle. Mice were sacrificed at day 6, spleens were harvested, the frequency and number of leukemia specific OT-1 T cells were counted and plotted. N=7 for each group.

Figure S9

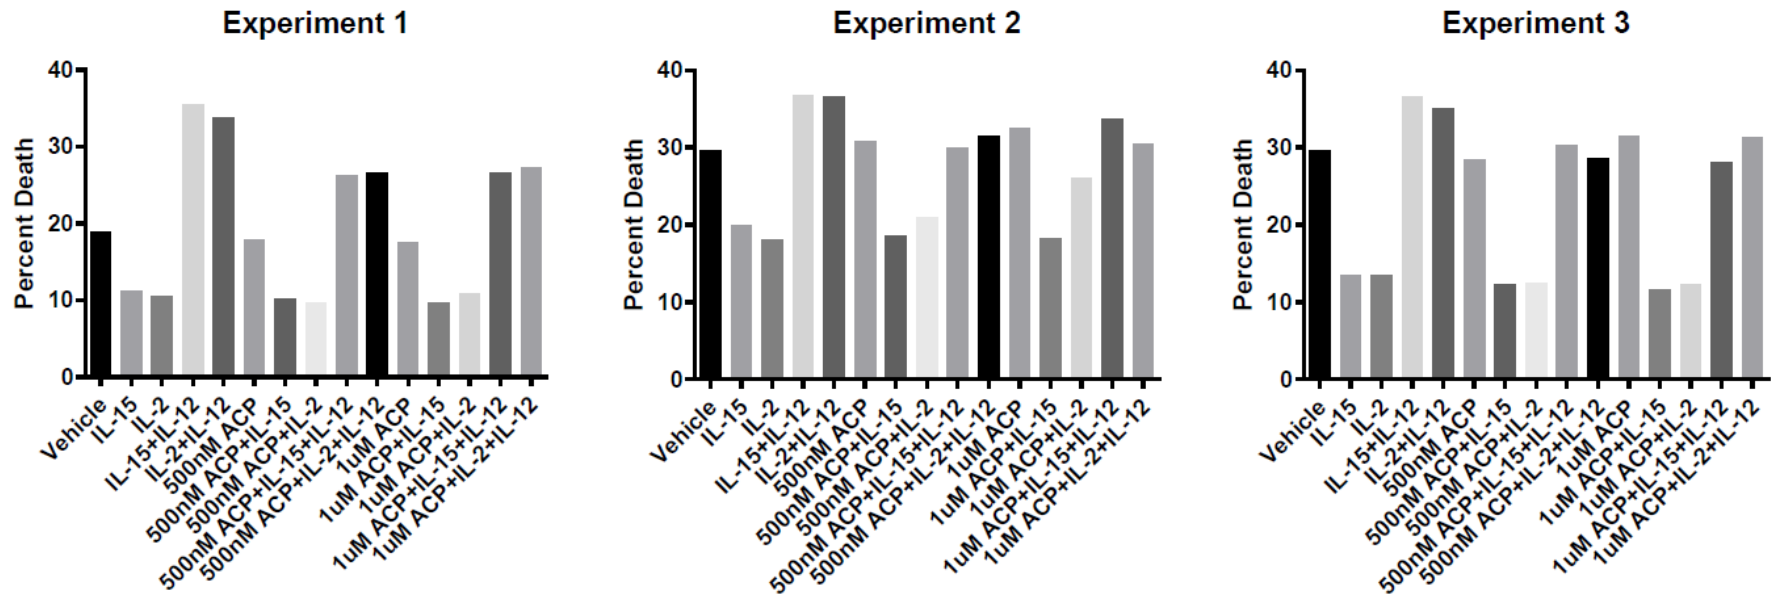

Figure S9: Human CD56+/CD3-/14-/20- NK cells were isolated from peripheral blood from normal donors by negative enrichment, and were then sorted to greater than 99% purity by FACSaria II sorter. Purified NK cells were plated at 5x10<sup>4</sup> cells/well and were cultured for three days. IL-15 and IL-2 were added as indicated for a final concentration of 10ng/mL. IL-12 (Milenyi Biotec) was added where indicated at a concentration of 10ng/mL to induce activation induced cell death. Vehicle control versus acalabrutinib 500nM, acalabrutinib 1000nM were added to rescue cytokine induced NK cell death. Bar graphs that show the percentage of non-viable (apoptotic + necrotic, as defined by Annexin V positive and TO-PRO-3 positive cells) cells after induction of AICD. ACP: acalabrutinib (ACP-196)

**Table S1:** IC50 values for inhibition of enzymatic activity by ibrutinib versus acalabrutinib.

| Kinase | IC50 (nM) of<br>acalabrutinib | IC50 (nM) of<br>ibrutinib |
|--------|-------------------------------|---------------------------|
| BTk    | 5.1 ± 1.0                     | 1.5 ± 0.2                 |
| BMX    | 46 ± 12                       | 0.8 ± 0.1                 |
| ITK    | >1000                         | 4.9 ± 1.2                 |
| TEC    | 93 ± 35                       | 7 ± 2.5                   |
| TXK    | 368 ± 141                     | 2.0 ± 0.3                 |
| EGFR   | >1000                         | 5.3 ± 1.3                 |
| ERBB2  | ~ 1000                        | 6.4 ± 1.8                 |
| ERBB4  | 16 ± 5                        | 3.4 ± 1.3                 |
| JAK3   | >1000                         | 32 ± 15                   |
| BLK    | >1000                         | 0.1 ± 0.0                 |
| FGR    | >1000                         | 3.3 ± 1.1                 |
| FYN    | >1000                         | 29 ± 0                    |
| HCK    | >1000                         | 29 ± 0                    |
| LCK    | >1000                         | 6.3 ± 1.3                 |
| LYN    | >1000                         | 20 ± 1                    |
| SRC    | >1000                         | 19 ± 1                    |
| YES1   | >1000                         | 4.1 ± 0.2                 |
| CSK    | 86                            | 2.25                      |
| BRK    | 79                            | 3.34                      |
| FLT3   | 100                           | 72.9                      |

Table S2: detailed patient information

| Exp | gender | time of treatment | year of diagnosis | Rai stage at the time of treatment | line of prior Tx                                                                                                                                                                                                                                                                                                                                                                                                                                                                                                                                                                                                                                                                                                                                                                                                                                                                                                                                                                                                                                                                                                                                                                                                  | Cygoogenetics/FISH results |         |          |            |      |      |       |      | complex karyotype ? | IgVH mutation status (%) | % bone marrow involvement | baseline ALC | cycle 3 ALC | Cycle 6 ALC | age at treatment | age at diagnosis |
|-----|--------|-------------------|-------------------|------------------------------------|-------------------------------------------------------------------------------------------------------------------------------------------------------------------------------------------------------------------------------------------------------------------------------------------------------------------------------------------------------------------------------------------------------------------------------------------------------------------------------------------------------------------------------------------------------------------------------------------------------------------------------------------------------------------------------------------------------------------------------------------------------------------------------------------------------------------------------------------------------------------------------------------------------------------------------------------------------------------------------------------------------------------------------------------------------------------------------------------------------------------------------------------------------------------------------------------------------------------|----------------------------|---------|----------|------------|------|------|-------|------|---------------------|--------------------------|---------------------------|--------------|-------------|-------------|------------------|------------------|
|     |        |                   |                   |                                    |                                                                                                                                                                                                                                                                                                                                                                                                                                                                                                                                                                                                                                                                                                                                                                                                                                                                                                                                                                                                                                                                                                                                                                                                                   | Del 13                     | Del 11q | Del 17q  | Trisomy 12 | 6q21 | 2p12 | 14q32 | 8q24 |                     |                          |                           |              |             |             |                  |                  |
| 1   | F      | 10/11/2013        | 2009              | 3                                  | Kipps Regimen x1 cycle March 2013                                                                                                                                                                                                                                                                                                                                                                                                                                                                                                                                                                                                                                                                                                                                                                                                                                                                                                                                                                                                                                                                                                                                                                                 | positive                   |         | positive |            |      |      |       |      | no                  | 7.6                      | >90                       | 40.85        | 81.87       | 73.56       | 71               | 66               |
| 2   | M      | 7/9/2013          | 2012              | 4                                  | BR x 6, 7/2012 - 12/2012 5/16/13: Ofatumumab + Dinacilib on protocol 11120. . Aa by 2015: pancytopenia, platelet transfusion dependent.                                                                                                                                                                                                                                                                                                                                                                                                                                                                                                                                                                                                                                                                                                                                                                                                                                                                                                                                                                                                                                                                           | 81                         | 83.7    |          |            |      |      |       |      | no                  | 0.4                      | 90                        | 15.71        | 76.60       | 47.63       | 62               | 61               |
| 3   | M      | 1/18/2014         | 2006              | 2                                  | FCR X6 finished by 8/2009.                                                                                                                                                                                                                                                                                                                                                                                                                                                                                                                                                                                                                                                                                                                                                                                                                                                                                                                                                                                                                                                                                                                                                                                        | 93.4                       | 91.5    |          |            | 84.8 |      | 88.6  |      | yes                 | 0                        | 70                        | 90.21        | 153.45      | 15.25       | 51               | 44               |
| 4   | F      | 4/1/2014          | 2007              | 4                                  | FR X8 by 8/2012, Rituxan + steroid for AIHA 2014.                                                                                                                                                                                                                                                                                                                                                                                                                                                                                                                                                                                                                                                                                                                                                                                                                                                                                                                                                                                                                                                                                                                                                                 | no                         | 87      | 87       | no         | no   | no   |       | 73.2 | yes                 | 0.3                      | 80-90                     | 22.52        | 24.53       | 10.43       | 79               | 72               |
| 5   | F      | 10/29/2012        | 2001              | 3/4                                | 1st: chlorambucil from May 2005 through June 2006 with rituximab given in spring 2006. She had a partial response, lasted 2 years (progressive lymphocytosis and abdominal pain and GI symptoms with bulky adenopathy in the abdomen)<br>2nd: chlorambucil in October 2008 given with prednisone in February 2009. No response<br>3rd: PCR (pentostatin, cyclophosphamide, rituximab) for two cycles in March and April 2009- this was complicated by pneumonia. Treatment free for one year.<br>4th: rituximab weekly x 4 (March – April 2010), progressive lymphocytosis, bulky abdominal nodes an splenomegaly, six months<br>5th: CVP for one cycle in October 2010, then R-CVP on 11/17/2010. complicated by jaw pain and constipation – she had decreased adenopathy though. Treatment free for 3 months.<br>6th bendamustine + rituximab x 2 cycles February & March 2011<br>7th: High dose methylprednisone + rituximab June - July 2012 - pretreatment - WBC 208.3, Hgb 8.4, Platelets 70,000, following therapy on 7/23/12, she had WBC 113.7, hemoglobin 10.5, and platelets 68. She had increasing adenopathy.<br>8th: Ofatumumab: 8 weekly doses from July to Sep 2012. Last dose was 09/24/12 2012. | 85.8                       |         |          |            |      |      |       | no   | 0.3                 | 96                       | 29.88                     | 202.70       | 47.56       | 60          | 49               |                  |
| 6   | F      | 6/11/2012         | 2010              | 4                                  | Ofatumumab 1-3/2012. per 10023                                                                                                                                                                                                                                                                                                                                                                                                                                                                                                                                                                                                                                                                                                                                                                                                                                                                                                                                                                                                                                                                                                                                                                                    | 94.3                       |         |          |            |      |      |       |      | no                  | 0.3                      | >90                       | 18.40        | 50.46       | 41.96       | 78               | 76               |
| 7   | M      | 7/24/2012         | 2001              | 4                                  | ofatumumab starting 10/2011 and received 8 weeks followed by 1 maintenance dose in February 2012.                                                                                                                                                                                                                                                                                                                                                                                                                                                                                                                                                                                                                                                                                                                                                                                                                                                                                                                                                                                                                                                                                                                 | 53.7                       |         |          |            |      |      |       |      | no                  | 3.68                     | >80                       | 51.78        | 112.02      | 126.80      | 51               | 40               |
| 8   | F      | 7/18/2012         | 2006              | 4                                  | March 2011 weekly x 4 rituximab ending 3/30/2012.                                                                                                                                                                                                                                                                                                                                                                                                                                                                                                                                                                                                                                                                                                                                                                                                                                                                                                                                                                                                                                                                                                                                                                 |                            | 95      | 88.5     |            |      |      |       |      | yes                 | 0                        | 95                        | 61.85        | 169.59      | 86.69       | 56               | 50               |
| 9   | M      | 10/21/2012        | 2003              | 4                                  | 2008 - FCR + Campath X6 CR<br>2/2012 - Rit + Revlamid 3 cycles - pneumonia<br>#1: 1995. chlorambucil, prednisone, and fludarabine .<br>#2: 9 cycles of CHOP which led to reduction in the number of leukemic cells in his bone marrow.<br>#3: allo SCT in 03/1997 - remission for about 9 years till 2006.<br>#4: single agent Rituxan for about 2 years, and subsequently with rituxan-bendamustine combination.<br>#5: Revlimid , at first at 10mg every other day.<br>#6: January 2011, briefly treated on study with ofatumumab , pancytopenia and sepsis after 1st dose - he had a good hematologic response                                                                                                                                                                                                                                                                                                                                                                                                                                                                                                                                                                                                 | 26.9                       | 93      |          |            |      |      |       | no   | 1.1                 |                          | 9.38                      | 93.79        | 55.10       | 66          | 56               |                  |
| 10  | M      | 10/17/2012        | 1980              | 4                                  |                                                                                                                                                                                                                                                                                                                                                                                                                                                                                                                                                                                                                                                                                                                                                                                                                                                                                                                                                                                                                                                                                                                                                                                                                   | 84.4                       |         |          |            |      |      |       |      | no                  | 2.5                      | 90                        | 81.48        | 99.10       | 31.09       | 71               | 39               |
| 11  | M      | 9/26/2012         | 2009              | 4                                  | 1. 6 cycles of R-CVP, completing in April 2010 in Tampa Florida. He returned to Dayton, OH and had a bone marrow biopsy because of thrombocytopenia in July 2010 which showed persistent CLL involvement of somewhere between 30-50%. He was feeling well with normal counts and continued to be monitored. His WBC count 5/2011 had risen to the 30,000 range and his physician repeated his BM biopsy which showed 80% cellularity with 70% involvement by CLL.<br>2. 6 cycles of BR from Aug 2011 to Jan 2012 at local facility<br>3. 4 weekly Rituxan and prednisone in June 2012 due to AIHA                                                                                                                                                                                                                                                                                                                                                                                                                                                                                                                                                                                                                 | 75.4                       | 93.8    |          |            | 80.1 |      |       | yes  | 0                   | 70                       | 19.13                     | 59.19        | 22.62       | 77          | 74               |                  |
| 12  | M      | 11/5/2012         | 2002              | 4                                  | * Radiation: to cervical LAD in 2004<br>* Rituxan: 4 weekly treatments in 2004<br>* Rituxan: 4 weekly treatments in 2005<br>* Chlorambucil: 2006-2008<br>* Rituxan: on/off 2007-2008 along with Chlorambucil<br>* FCR: 2008-2009 x 6 cycles in CR<br>* Rituxan/solumedrol: 08/2012<br>* Revlimid: on study in Jacksonville, FL at Mayo clinic 09/07/12-10/01/12                                                                                                                                                                                                                                                                                                                                                                                                                                                                                                                                                                                                                                                                                                                                                                                                                                                   | 93.5                       |         |          |            |      |      | 67.5  | no   | 0                   | 90                       | 29.52                     | 194.49       | 58.56       | 67          | 56               |                  |
| 13  | M      | 11/7/2012         | 2001              | 4                                  | 1. FCR x 6 cycles: 6/2003 through 11/2003; best response = CR<br>2. R-lenalidomide: 6/2008 through 12/2008; discontinued secondary to severe thrombocytopenia<br>3. FCR x 4 cycles 2009/2010<br>4. Kipps regimen (solu-medrol, rituximab) x 2 cycle starting 8/20/2012                                                                                                                                                                                                                                                                                                                                                                                                                                                                                                                                                                                                                                                                                                                                                                                                                                                                                                                                            |                            | 96.4    |          |            | 88.2 |      |       | yes  | 0                   | 70                       | 17.34                     | 92.82        | 41.86       | 66          | 55               |                  |
| 14  | M      | 12/4/2012         | 1989              | 4                                  | - fludarabine x 6 in April 1993<br>- fludarabine x 2 in October 2001<br>- rituximab weekly x 4 in early 2002<br>- rituximab weekly in May 2005<br>- rituximab weekly in January 2007<br>- rituximab + fludarabine on an abbreviated schedule x 3 in 7/2008<br>- fludarabine + rituximab + Neulasta x 4 cycles in 2010,<br>- rituximab weekly in October 2012                                                                                                                                                                                                                                                                                                                                                                                                                                                                                                                                                                                                                                                                                                                                                                                                                                                      | 93.5                       |         |          |            |      |      |       | yes  | 6                   | 90                       | 19.62                     | 101.19       | 65.33       | 66          | 43               |                  |
| 15  | F      | 2/20/2013         | 2007              | 4                                  | FCR done in 2008, maintenance R X 6 months. BR starting 8/2011, only 1 cycle. ofatumumab locally from Jan to July 2012..                                                                                                                                                                                                                                                                                                                                                                                                                                                                                                                                                                                                                                                                                                                                                                                                                                                                                                                                                                                                                                                                                          | 95.6                       | 96.6    |          |            |      |      |       |      | yes                 | 0.3                      | 99                        | 154.84       | 280.57      | 248.83      | 60               | 54               |
| 16  | F      | 1/28/2013         | 2004              | 4                                  | 1. FC X 1, FCR x 1 (cytopenias, rituximab infusion reaction)<br>2. CVP x 6 -> rituximab weekly x 4<br>3. FCR x 4 (completed 3/2006)<br>4. BR + CAL101 (5/2011), discontinued secondary to rash<br>5. Ofatumumab (7-12/2011)                                                                                                                                                                                                                                                                                                                                                                                                                                                                                                                                                                                                                                                                                                                                                                                                                                                                                                                                                                                       |                            |         |          |            |      |      |       | no   | 0                   | 90                       | 126.52                    | 178.32       | 47.26       | 61          | 53               |                  |
| 17  | M      | 3/25/2013         | 2001              | 4                                  | * 7/16/2001-12/2001 fludarabine x 6. Nearly achieved CR.<br>* 5/2004: FCR x 4 for progressive lymphocytosis to prepare for alloSCT - dose reduction of cyclophosphamide and fludarabine secondary to cytopenias. Achieved significant cytoreduction.<br>* 9/2004: RIC flu/bu/tbi alloSCT from matched sibling (brother). Some rash, but unclear if GVHD. 10/05: Bone marrow showed CR                                                                                                                                                                                                                                                                                                                                                                                                                                                                                                                                                                                                                                                                                                                                                                                                                             | 89.6                       | 92      |          |            |      |      | 55.6  |      | yes                 | 0.3                      | 85                        | 38.56        | 55.10       | 29.10       | 50               | 39               |
| 18  | F      | 7/2/2013          | 2002              | 4                                  | > FCR x 6 cycles in 8/2004                                                                                                                                                                                                                                                                                                                                                                                                                                                                                                                                                                                                                                                                                                                                                                                                                                                                                                                                                                                                                                                                                                                                                                                        | 45.9                       |         |          |            |      |      |       |      | no                  | 6.1                      | >90                       | 35.40        | 96.52       | 70.29       | 64               | 53               |
| 19  | M      | 6/25/2013         | 2001              | 4                                  | * 1/2005: eight weekly doses of rituximab-> PR.<br>* 10/2006 to 4/2007 with eight treatments two times a month.<br>* fenretinide from July of 2007 to January of 2008 on a clinical trial with four doses of rituximab from 7-8/2007 and then continued on oral fenretinide.<br>* 6 cycles of FCR from March to August 2008                                                                                                                                                                                                                                                                                                                                                                                                                                                                                                                                                                                                                                                                                                                                                                                                                                                                                       |                            |         |          |            |      |      |       | no   | 0.3                 | 90                       | 20.66                     | 206.78       | 37.47       | 62          | 51               |                  |

Table S3, list of antibodies used.

| Antigen        | fluorochrome    | vendor         | Catalog #  | clone           |
|----------------|-----------------|----------------|------------|-----------------|
| BTLA           | PE              | Biolegend      | 344505     | MIH26           |
| CCR7           | PE Cy7          | Biolegend      | 353225     | G043H7          |
| CD11b          | PerCP-Efluor710 | eBiosciences   | 46-0118-41 | ICRF44          |
| CD11c          | PE Efluor 610   | eBiosciences   | 61-0116    | 3.9             |
| CD122          | BV421           | BD Biosciences | 562887     | Mik- $\beta$ 3  |
| CD123          | PE Efluor 610   | eBiosciences   | 61-1239-41 | 6H6             |
| CD14           | PE-CF594        | BD Biosciences | 562334     | M $\phi$ P9     |
| CD16           | FITC            | eBiosciences   | 11-0168-41 | eBioCB16 (CB16) |
| CD160          | APC             | Biolegend      | 341203     | BY55            |
| CD160          | PE Cy7          | Biolegend      | 341211     | BY55            |
| CD180<br>MD1   | PE              | eBiosciences   | 12-1809-41 | MHR73-11        |
| CD19           | PerCP-Efluor710 | eBiosciences   | 46-0198-41 | SJ25C1          |
| CD19           | APC-R700        | BD Biosciences | 564977     | HIB19,          |
| CD19           | BB515           | BD Biosciences | 564456     | HIB19           |
| CD2            | fitxc           | BD Biosciences | 347593     | S5.2            |
| CD200          | APC             | eBiosciences   | 17-9200-41 | OX104           |
| CD24           | PE-CF594        | BD Biosciences | 562405     | ML5             |
| CD244          | PE              |                | 329507     | C1.7            |
| CD244          | PerCP-Cy5.5     | biolegend      | 329515     | C1.7            |
| CD25           | PE Cy7          | eBiosciences   | 25-0259-41 | BC96            |
| CD25           | PE cy7          | eBiosciences   | 25-0259-41 | BC96            |
| CD26           | PE-CF594        | BD Biosciences | 565158     | M-A261          |
| CD26           | PerCp cy5.5     | biolgend       | 302715     | BA5b            |
| CD27           | PE              | BD Biosciences | 560985     | M-T271          |
| CD27           | eFluor® 450     | eBiosciences   | 48-0279-41 | O323            |
| CD27           | BB515           | BD Biosciences | 564643     | M-T271          |
| CD28           | PE              | eBiosciences   | 12-0289-41 | CD28.2          |
| CD290<br>TLR10 | PE              | eBiosciences   | 12-2909-41 | 3C10C5          |
| CD3            | APC-R700        | BD Biosciences | 659110     | SK7 (Leu-4)     |
| CD31           | APC             | eBiosciences   | 17-0319-41 | WM59            |
| CD33           | APC             | eBiosciences   | 17-0338-41 | WM-53           |
| CD38           | PE Cy7          | eBiosciences   | 25-0388-41 | HB7             |
| CD4            | Apc R700        | BD Biosciences | 564976     | RPA-T4          |
| CD4            | BB515           | BD Biosciences | 564420     | RPA-T4          |
| CD45RA         | PerCP-Cy5.5     | BD Biosciences | 563429     | HI100           |
| CD5            | BV510           | BD Biosciences | 563380     | UCHT2           |

|        |             |                |             |             |
|--------|-------------|----------------|-------------|-------------|
| CD57   | PE-CF594    | BD Biosciences | 562488      | NK-1        |
| CD62L  | BV510       | BD Biosciences | 563203      | DREG-56     |
| CD7    | BB515       | BD Biosciences | 565211      | M-T701      |
| CD8    | BV510       | Biolegend      | 344731      | SK1         |
| CD8    | PECF594     | BD Biosciences | 562311      | RPA-T8      |
| CD8    | PE-Cy7      | eBiosciences   | 25-0087-41  | SK1         |
| CD9    | PerCp cy5.5 | BD Biosciences | 561329      | M-L13       |
| CD95   | BB515       | BD Biosciences | 564597      | DX2         |
| CTLA4  | BV421       | BD Biosciences | 562743      | BNI3        |
| CTLA4  | PE-CF594    | BD Biosciences | 562742      | BNI3        |
| EOMES  | PE          | eBiosciences   | 12-4877-41  | WD1928      |
| FCRL3  | BB515       | BD Biosciences | 565026      | H5          |
| Foxp3  | PE          | BD Biosciences | 560082      | 259D/C7     |
| HLA-A2 | PECy7       | eBiosciences   | 25-9876-41  | BB7.2       |
| HLADR  | BV421       | BD Biosciences | 562805      | G46-6       |
| IDO    | eflour 660  | eBiosciences   | 50-9477-41  | eyedio      |
| IFNg   | PerCP-Cy5.5 | eBiosciences   | 45-7319-41  | 4S.B3       |
| IgD    | BV421       | BD Biosciences | 562518      | IA6-2       |
| IgG    | Alexa700    | BD Biosciences | 561296      | G18-145     |
| IgM    | APC         | BD Biosciences | 561010      | G20-127     |
| IL-10  | PE          | eBiosciences   | 12-7108-41  | JES3-9D7    |
| IL-17A | APC         | eBiosciences   | 17-7179-41  | eBio64DEC17 |
| IL2    | BV421       | BD Biosciences | 562914      | 5344.111    |
| IL-4   | PE          | BD Biosciences | 554516      | 8D4-8       |
| KLRG1  | BV421       | biolgend       | 138413      | 2F1         |
| LAG3   | PE Cy7      | eBiosciences   | 25-2239-41  | 3DS223H     |
| LAG3   | APC         | eBiosciences   | 17-2239-41  | 3DS223H     |
| PD1    | BB515       | BD Biosciences | 564494      | EH12.1      |
| PD1    | BV421       | BD Biosciences | 563842      | MIH18       |
| PTK7   | PE          | miltenyibiotec | 130-099-109 | 188B        |
| Tim3   | APC         | eBiosciences   | 17-3109-41  | F38-2E2     |
| Tim3   | BV421       | Biolgend       | 345007      | F38-2E2     |
| TNFa   | PE Cy7      | eBiosciences   | 25-7349-41  | MAb11       |
| TNFa   | eFluor® 450 | eBiosciences   | 48-7349-41  | MAb11       |

**Table S4. P-values from initial and updated cohorts**

An initial analysis was performed using data from 17 patients treated with ibrutinib and 9 patients treated with acalabrutinib. Later, an additional 2 patients with ibrutinib and 4 patients with acalabrutinib were added to the original cohorts and the analysis was redone; this second analysis was not planned at the time of the first analysis. P-values from the initial and new analyses are shown below for comparison purposes. Note that in the original analysis, p-values within each figure were adjusted for multiple comparisons using Hochberg's procedure, while unadjusted p-values are presented in the new analysis. Not all experiments were performed on each patient's serial sample, therefore the actual "N" for each experiment was less than 19 and 13 for ibrutinib and acalabrutinib treated patients, respectively.

| Figure                                  | Comparison                              | Initial Cohort |         | Updated Cohort |         |
|-----------------------------------------|-----------------------------------------|----------------|---------|----------------|---------|
|                                         |                                         | N              | P-value | N              | P-value |
| <b>1A (ibrutinib): CD8+ T cells</b>     | Total CD8+ T cells: cycle 3 vs baseline | 16             | 0.001   | 18             | <.001   |
|                                         | Total CD8+ T cells: cycle 6 vs baseline | 16             | 0.007   | 18             | 0.006   |
|                                         | Naïve CD8+ T cells: cycle 3 vs baseline | 16             | 0.001   | 18             | <.001   |
|                                         | Naïve CD8+ T cells: cycle 6 vs baseline | 16             | 0.053   | 18             | 0.035   |
|                                         | CM CD8+ T cells: cycle 3 vs baseline    | 16             | 0.001   | 18             | 0.001   |
|                                         | CM CD8+ T cells: cycle 6 vs baseline    | 16             | 0.418   | 18             | 0.370   |
|                                         | EM CD8+ T cells: cycle 3 vs baseline    | 16             | 0.001   | 18             | <.001   |
|                                         | EM CD8+ T cells: cycle 6 vs baseline    | 16             | 0.005   | 18             | 0.009   |
|                                         | EMRA CD8+ T cells: cycle 3 vs baseline  | 16             | <.001   | 18             | <.001   |
|                                         | EMRA CD8+ T cells: cycle 6 vs baseline  | 16             | <.001   | 18             | 0.001   |
| <b>1A (ibrutinib): CD4+ T cells</b>     | Total CD8+ T cells: cycle 3 vs baseline | 16             | 0.002   | 18             | <.001   |
|                                         | Total CD8+ T cells: cycle 6 vs baseline | 16             | 0.019   | 18             | 0.009   |
|                                         | Naïve CD8+ T cells: cycle 3 vs baseline | 16             | 0.010   | 18             | 0.002   |
|                                         | Naïve CD8+ T cells: cycle 6 vs baseline | 16             | 0.494   | 18             | 0.185   |
|                                         | CM CD8+ T cells: cycle 3 vs baseline    | 16             | 0.052   | 18             | 0.026   |
|                                         | CM CD8+ T cells: cycle 6 vs baseline    | 16             | 0.745   | 18             | 0.549   |
|                                         | EM CD8+ T cells: cycle 3 vs baseline    | 16             | 0.001   | 18             | 0.001   |
|                                         | EM CD8+ T cells: cycle 6 vs baseline    | 16             | 0.007   | 18             | 0.006   |
|                                         | EMRA CD8+ T cells: cycle 3 vs baseline  | 16             | 0.001   | 18             | <.001   |
|                                         | EMRA CD8+ T cells: cycle 6 vs baseline  | 16             | <.001   | 18             | <.001   |
| <b>1B (acalabrutinib): CD8+ T cells</b> | Total CD8+ T cells: cycle 3 vs baseline | 8              | 0.960   | 12             | 0.999   |
|                                         | Total CD8+ T cells: cycle 6 vs baseline | 8              | 0.960   | 12             | 0.329   |
|                                         | Naïve CD8+ T cells: cycle 3 vs baseline | 8              | 0.813   | 12             | 0.772   |
|                                         | Naïve CD8+ T cells: cycle 6 vs baseline | 8              | 0.813   | 12             | 0.857   |
|                                         | CM CD8+ T cells: cycle 3 vs baseline    | 8              | 0.960   | 12             | 0.556   |
|                                         | CM CD8+ T cells: cycle 6 vs baseline    | 8              | 0.813   | 12             | 0.127   |
|                                         | EM CD8+ T cells: cycle 3 vs baseline    | 8              | 0.960   | 12             | 0.848   |
|                                         | EM CD8+ T cells: cycle 6 vs baseline    | 8              | 0.960   | 12             | 0.353   |
|                                         | EMRA CD8+ T cells: cycle 3 vs baseline  | 8              | 0.813   | 12             | 0.694   |
|                                         | EMRA CD8+ T cells: cycle 6 vs baseline  | 8              | 0.813   | 12             | 0.319   |
| <b>1B (acalabrutinib): CD4+ T cells</b> | Total CD8+ T cells: cycle 3 vs baseline | 9              | 0.960   | 12             | 0.984   |
|                                         | Total CD8+ T cells: cycle 6 vs baseline | 9              | 0.960   | 12             | 0.893   |
|                                         | Naïve CD8+ T cells: cycle 3 vs baseline | 8              | 0.612   | 12             | 0.264   |
|                                         | Naïve CD8+ T cells: cycle 6 vs baseline | 8              | 0.813   | 12             | 0.653   |
|                                         | CM CD8+ T cells: cycle 3 vs baseline    | 8              | 0.960   | 12             | 0.939   |

| Figure                                            | Comparison                                     | Initial Cohort |         | Updated Cohort |         |
|---------------------------------------------------|------------------------------------------------|----------------|---------|----------------|---------|
|                                                   |                                                | N              | P-value | N              | P-value |
|                                                   | CM CD8+ T cells: cycle 6 vs baseline           | 8              | 0.960   | 12             | 0.940   |
|                                                   | EM CD8+ T cells: cycle 3 vs baseline           | 8              | 0.960   | 12             | 0.841   |
|                                                   | EM CD8+ T cells: cycle 6 vs baseline           | 8              | 0.960   | 12             | 0.942   |
|                                                   | EMRA CD8+ T cells: cycle 3 vs baseline         | 8              | 0.070   | 12             | 0.527   |
|                                                   | EMRA CD8+ T cells: cycle 6 vs baseline         | 8              | 0.135   | 12             | 0.691   |
| <b>2C (ibrutinib):<br/>Absolute cell #</b>        | Cycle 3 vs. baseline                           | 13             | 0.049   | 15             | 0.002   |
|                                                   | Cycle 6 vs. baseline                           | 13             | 0.074   | 15             | 0.845   |
| <b>2C (ibrutinib):<br/>Percentage</b>             | Cycle 3 vs. baseline                           | 13             | 0.298   | 15             | 0.564   |
|                                                   | Cycle 6 vs. baseline                           | 13             | 0.016   | 15             | 0.094   |
| <b>3A (ibrutinib):<br/>CD8 T cell subsets</b>     | Total CD8 T cells: cycle 3 vs baseline         | 15             | 0.041   | 17             | 0.001   |
|                                                   | Total CD8 T cells: cycle 6 vs baseline         | 15             | 0.004   | 17             | <.001   |
|                                                   | Naïve CD8+ T cells: cycle 3 vs baseline        | 15             | 0.317   | 17             | 0.075   |
|                                                   | Naïve CD8+ T cells: cycle 6 vs baseline        | 15             | 0.125   | 17             | 0.015   |
|                                                   | T-CM CD8+ cells: cycle 3 vs baseline           | 15             | 0.116   | 17             | 0.002   |
|                                                   | T-CM CD8+ cells: cycle 6 vs baseline           | 15             | 0.001   | 17             | <.001   |
|                                                   | T-EM CD8+ cells: cycle 3 vs baseline           | 15             | 0.115   | 17             | 0.007   |
|                                                   | T-EM CD8+ cells: cycle 6 vs baseline           | 15             | 0.017   | 17             | <.001   |
|                                                   | T-EMRA CD8+ cells: cycle 3 vs baseline         | 15             | 0.622   | 17             | 0.351   |
|                                                   | T-EMRA CD8+ cells: cycle 6 vs baseline         | 15             | 0.117   | 17             | 0.005   |
|                                                   | T-EM CD8+ cells (CD27+): cycle 3 vs baseline   | 15             | 0.399   | 17             | 0.118   |
|                                                   | T-EM CD8+ cells (CD27+): cycle 6 vs baseline   | 15             | 0.117   | 17             | 0.010   |
|                                                   | T-EM CD8+ cells (CD27-): cycle 3 vs baseline   | 15             | 0.117   | 17             | 0.008   |
|                                                   | T-EM CD8+ cells (CD27-): cycle 6 vs baseline   | 15             | 0.020   | 17             | <.001   |
|                                                   | T-EMRA CD8+ cells (CD27+): cycle 3 vs baseline | 15             | 0.117   | 17             | 0.012   |
|                                                   | T-EMRA CD8+ cells (CD27+): cycle 6 vs baseline | 15             | 0.020   | 17             | 0.001   |
| <b>3B (acalabrutinib):<br/>CD8 T cell subsets</b> | Total CD8 T cells: cycle 3 vs baseline         | 8              | 0.053   | 10             | 0.001   |
|                                                   | Total CD8 T cells: cycle 6 vs baseline         | 8              | 0.025   | 10             | <.001   |
|                                                   | Naïve CD8+ T cells: cycle 3 vs baseline        | 8              | 0.053   | 10             | 0.006   |
|                                                   | Naïve CD8+ T cells: cycle 6 vs baseline        | 8              | 0.028   | 10             | 0.001   |
|                                                   | T-CM CD8+ cells: cycle 3 vs baseline           | 8              | 0.229   | 10             | 0.006   |
|                                                   | T-CM CD8+ cells: cycle 6 vs baseline           | 8              | 0.034   | 10             | <.001   |
|                                                   | T-EM CD8+ cells: cycle 3 vs baseline           | 8              | 0.094   | 10             | 0.006   |
|                                                   | T-EM CD8+ cells: cycle 6 vs baseline           | 8              | 0.148   | 10             | 0.006   |
|                                                   | T-EMRA CD8+ cells: cycle 3 vs baseline         | 8              | 0.651   | 10             | 0.114   |
|                                                   | T-EMRA CD8+ cells: cycle 6 vs baseline         | 8              | 0.106   | 10             | 0.002   |
|                                                   | T-EM CD8+ cells (CD27+): cycle 3 vs baseline   | 8              | 0.245   | 10             | 0.019   |
|                                                   | T-EM CD8+ cells (CD27+): cycle 6 vs baseline   | 8              | 0.229   | 10             | 0.005   |
|                                                   | T-EM CD8+ cells (CD27-): cycle 3 vs baseline   | 8              | 0.028   | 10             | 0.957   |
|                                                   | T-EM CD8+ cells (CD27-): cycle 6 vs baseline   | 8              | 0.113   | 10             | 0.245   |
|                                                   | T-EMRA CD8+ cells (CD27+): cycle 3 vs baseline | 8              | 0.181   | 10             | 0.005   |
|                                                   | T-EMRA CD8+ cells (CD27+): cycle 6 vs baseline | 8              | 0.004   | 10             | <.001   |
| <b>4A (ibrutinib):<br/>CTLA4</b>                  | Total CD4 T cells: cycle 3 vs baseline         | 16             | 0.001   | 18             | <.001   |
|                                                   | Total CD4 T cells: cycle 6 vs baseline         | 16             | <.001   | 18             | <.001   |
|                                                   | CD45RA- CD4 T cells: cycle 3 vs baseline       | 16             | 0.001   | 18             | <.001   |
|                                                   | CD45RA- CD4 T cells: cycle 6 vs baseline       | 16             | <.001   | 18             | <.001   |

| Figure                                      | Comparison                               | Initial Cohort |         | Updated Cohort |         |
|---------------------------------------------|------------------------------------------|----------------|---------|----------------|---------|
|                                             |                                          | N              | P-value | N              | P-value |
|                                             | CD45RA+ CD4 T cells: cycle 3 vs baseline | 16             | 0.005   | 18             | 0.002   |
|                                             | CD45RA+ CD4 T cells: cycle 6 vs baseline | 16             | 0.001   | 18             | <.001   |
| <b>4B (acalabrutinib):<br/>CTLA4</b>        | Total CD4 T cells: cycle 3 vs baseline   | 8              | 0.182   | 9              | 0.122   |
|                                             | Total CD4 T cells: cycle 6 vs baseline   | 8              | 0.182   | 9              | 0.103   |
|                                             | CD45RA- CD4 T cells: cycle 3 vs baseline | 8              | 0.182   | 9              | 0.089   |
|                                             | CD45RA- CD4 T cells: cycle 6 vs baseline | 8              | 0.182   | 9              | 0.062   |
|                                             | CD45RA+ CD4 T cells: cycle 3 vs baseline | 8              | 0.050   | 9              | 0.007   |
|                                             | CD45RA+ CD4 T cells: cycle 6 vs baseline | 8              | 0.104   | 9              | 0.062   |
| <b>5A (ibrutinib):<br/>cytokines</b>        | IFN $\gamma$ : cycle 3 vs. baseline      | 14             | 0.803   | 15             | 0.999   |
|                                             | IFN $\gamma$ : cycle 6 vs. baseline      | 14             | 0.803   | 15             | 0.756   |
|                                             | TNF $\alpha$ : cycle 3 vs. baseline      | 14             | 0.803   | 15             | 0.571   |
|                                             | TNF $\alpha$ : cycle 6 vs. baseline      | 14             | 0.803   | 15             | 0.213   |
|                                             | IL-2: cycle 3 vs. baseline               | 14             | 0.803   | 15             | 0.876   |
|                                             | IL-2: cycle 6 vs. baseline               | 14             | 0.803   | 15             | 0.524   |
|                                             | IL-4: cycle 3 vs. baseline               | 14             | 0.803   | 15             | 0.245   |
|                                             | IL-4: cycle 6 vs. baseline               | 14             | 0.803   | 15             | 0.650   |
| <b>5B (acalabrutinib):<br/>cytokines</b>    | IL-17: cycle 3 vs. baseline              | 14             | 0.803   | 15             | 0.257   |
|                                             | IL-17: cycle 6 vs. baseline              | 14             | 0.059   | 15             | 0.008   |
| <b>6B (ibrutinib):<br/>Foxp3+ cells</b>     | IFN $\gamma$ : cycle 3 vs. baseline      | 7              | 0.075   | 11             | 0.007   |
|                                             | IFN $\gamma$ : cycle 6 vs. baseline      | 7              | 0.349   | 11             | 0.003   |
|                                             | TNF $\alpha$ : cycle 3 vs. baseline      | 7              | 0.357   | 11             | 0.033   |
|                                             | TNF $\alpha$ : cycle 6 vs. baseline      | 7              | 0.667   | 11             | 0.022   |
|                                             | IL-2: cycle 3 vs. baseline               | 7              | 0.987   | 11             | 0.767   |
|                                             | IL-2: cycle 6 vs. baseline               | 7              | 0.987   | 11             | 0.523   |
|                                             | IL-4: cycle 3 vs. baseline               | 7              | 0.987   | 11             | 0.210   |
|                                             | IL-4: cycle 6 vs. baseline               | 7              | 0.832   | 11             | 0.042   |
| <b>6C (acalabrutinib):<br/>Foxp3+ cells</b> | IL-17: cycle 3 vs. baseline              | 7              | 0.987   | 11             | 0.427   |
|                                             | IL-17: cycle 6 vs. baseline              | 7              | 0.987   | 11             | 0.880   |
| <b>7A (ibrutinib):<br/>CD200, BTLA</b>      | Percentage: cycle 3 vs. baseline         | 16             | <.001   | 18             | <.001   |
|                                             | Percentage: cycle 6 vs. baseline         | 16             | <.001   | 18             | <.001   |
|                                             | Absolute number: cycle 3 vs. baseline    | 16             | 0.411   | 18             | 0.282   |
|                                             | Absolute number: cycle 6 vs. baseline    | 16             | 0.700   | 18             | 0.694   |
| <b>7B (acalabrutinib):<br/>CD200, BTLA</b>  | Percentage: cycle 3 vs. baseline         | 8              | 0.386   | 11             | 0.553   |
|                                             | Percentage: cycle 6 vs. baseline         | 8              | 0.239   | 11             | 0.346   |
|                                             | Absolute number: cycle 3 vs. baseline    | 8              | 0.547   | 11             | 0.747   |
|                                             | Absolute number: cycle 6 vs. baseline    | 8              | 0.448   | 11             | 0.331   |
| <b>8C (ibrutinib):<br/>IL10+ cells</b>      | CD200: Cycle 3 vs. baseline              | 16             | <.001   | 18             | <.001   |
|                                             | CD200: Cycle 6 vs. baseline              | 16             | <.001   | 18             | <.001   |
|                                             | BTLA: Cycle 3 vs. baseline               | 14             | <.001   | 16             | <.001   |
|                                             | BTLA: Cycle 6 vs. baseline               | 14             | <.001   | 16             | <.001   |
| <b>8C (ibrutinib):<br/>IL10+ cells</b>      | CD200: Cycle 3 vs. baseline              | 8              | 0.002   | 12             | 0.001   |
|                                             | CD200: Cycle 6 vs. baseline              | 8              | 0.002   | 12             | <.001   |
|                                             | BTLA: Cycle 3 vs. baseline               | 8              | <.001   | 12             | <.001   |
|                                             | BTLA: Cycle 6 vs. baseline               | 8              | <.001   | 12             | <.001   |
| <b>8C (ibrutinib):<br/>IL10+ cells</b>      | 5 hours (B10): Cycle 3 vs. baseline      | 6              | 0.313   | 13             | 0.064   |
|                                             | 5 hours (B10): Cycle 6 vs. baseline      | 6              | 0.313   | 13             | 0.155   |
|                                             | 48 hours (B10 Pro): Cycle 3 vs. baseline | 16             | <.001   | 18             | <.001   |
|                                             | 48 hours (B10 Pro): Cycle 6 vs. baseline | 16             | <.001   | 18             | <.001   |

| Figure                                         | Comparison                               | Initial Cohort |         | Updated Cohort |         |
|------------------------------------------------|------------------------------------------|----------------|---------|----------------|---------|
|                                                |                                          | N              | P-value | N              | P-value |
| <b>8C (acalabrutinib):<br/>IL10+ cells</b>     | 5 hours (B10): Cycle 3 vs. baseline      | 5              | 0.118   | 10             | 0.028   |
|                                                | 5 hours (B10): Cycle 6 vs. baseline      | 5              | 0.313   | 10             | 0.211   |
|                                                | 48 hours (B10 Pro): Cycle 3 vs. baseline | 7              | 0.007   | 12             | <.001   |
|                                                | 48 hours (B10 Pro): Cycle 6 vs. baseline | 7              | 0.031   | 12             | <.001   |
| <b>S1A (ibrutinib):<br/>CD8+ T cells</b>       | Total CD8+ T cells: cycle 3 vs baseline  | 16             | 0.848   | 18             | 0.904   |
|                                                | Total CD8+ T cells: cycle 6 vs baseline  | 16             | 0.101   | 18             | 0.066   |
|                                                | Naïve CD8+ T cells: cycle 3 vs baseline  | 16             | 0.310   | 18             | 0.232   |
|                                                | Naïve CD8+ T cells: cycle 6 vs baseline  | 16             | 0.034   | 18             | 0.046   |
|                                                | CM CD8+ T cells: cycle 3 vs baseline     | 16             | 0.453   | 18             | 0.255   |
|                                                | CM CD8+ T cells: cycle 6 vs baseline     | 16             | 0.026   | 18             | 0.006   |
|                                                | EM CD8+ T cells: cycle 3 vs baseline     | 16             | 0.310   | 18             | 0.868   |
|                                                | EM CD8+ T cells: cycle 6 vs baseline     | 16             | 0.056   | 18             | 0.569   |
| <b>S1A (ibrutinib):<br/>CD4+ T cells</b>       | EMRA CD8+ T cells: cycle 3 vs baseline   | 16             | 0.994   | 18             | 0.206   |
|                                                | EMRA CD8+ T cells: cycle 6 vs baseline   | 16             | 0.185   | 18             | 0.017   |
|                                                | Total CD8+ T cells: cycle 3 vs baseline  | 16             | 0.848   | 18             | 0.712   |
|                                                | Total CD8+ T cells: cycle 6 vs baseline  | 16             | 0.092   | 18             | 0.051   |
|                                                | Naïve CD8+ T cells: cycle 3 vs baseline  | 16             | 0.360   | 18             | 0.915   |
|                                                | Naïve CD8+ T cells: cycle 6 vs baseline  | 16             | 0.048   | 18             | 0.553   |
|                                                | CM CD8+ T cells: cycle 3 vs baseline     | 16             | 0.026   | 18             | 0.015   |
|                                                | CM CD8+ T cells: cycle 6 vs baseline     | 16             | 0.001   | 18             | 0.001   |
| <b>S1B (acalabrutinib):<br/>CD8+ T cells</b>   | EM CD8+ T cells: cycle 3 vs baseline     | 16             | 0.067   | 18             | 0.806   |
|                                                | EM CD8+ T cells: cycle 6 vs baseline     | 16             | 0.001   | 18             | 0.102   |
|                                                | EMRA CD8+ T cells: cycle 3 vs baseline   | 16             | 0.056   | 18             | 0.010   |
|                                                | EMRA CD8+ T cells: cycle 6 vs baseline   | 16             | 0.101   | 18             | 0.106   |
|                                                | Total CD8+ T cells: cycle 3 vs baseline  | 9              | 0.734   | 12             | 0.574   |
|                                                | Total CD8+ T cells: cycle 6 vs baseline  | 9              | 0.382   | 12             | 0.032   |
|                                                | Naïve CD8+ T cells: cycle 3 vs baseline  | 8              | 0.786   | 12             | 0.708   |
|                                                | Naïve CD8+ T cells: cycle 6 vs baseline  | 8              | 0.734   | 12             | 0.960   |
| <b>S1B (acalabrutinib):<br/>CD4+ T cells</b>   | CM CD8+ T cells: cycle 3 vs baseline     | 8              | 0.851   | 12             | 0.321   |
|                                                | CM CD8+ T cells: cycle 6 vs baseline     | 8              | 0.602   | 12             | 0.405   |
|                                                | EM CD8+ T cells: cycle 3 vs baseline     | 8              | 0.715   | 12             | 0.559   |
|                                                | EM CD8+ T cells: cycle 6 vs baseline     | 8              | 0.786   | 12             | 0.846   |
|                                                | EMRA CD8+ T cells: cycle 3 vs baseline   | 8              | 0.731   | 12             | 0.151   |
|                                                | EMRA CD8+ T cells: cycle 6 vs baseline   | 8              | 0.734   | 12             | 0.778   |
|                                                | Total CD8+ T cells: cycle 3 vs baseline  | 9              | 0.734   | 12             | 0.569   |
|                                                | Total CD8+ T cells: cycle 6 vs baseline  | 9              | 0.382   | 12             | 0.024   |
| <b>S3A (ibrutinib):<br/>CD4 T cell subsets</b> | Naïve CD8+ T cells: cycle 3 vs baseline  | 8              | 0.397   | 12             | 0.165   |
|                                                | Naïve CD8+ T cells: cycle 6 vs baseline  | 8              | 0.715   | 12             | 0.605   |
|                                                | CM CD8+ T cells: cycle 3 vs baseline     | 8              | 0.715   | 12             | 0.778   |
|                                                | CM CD8+ T cells: cycle 6 vs baseline     | 8              | 0.602   | 12             | 0.698   |
|                                                | EM CD8+ T cells: cycle 3 vs baseline     | 8              | 0.648   | 12             | 0.460   |
|                                                | EM CD8+ T cells: cycle 6 vs baseline     | 8              | 0.930   | 12             | 0.942   |
| <b>S3A (ibrutinib):<br/>CD4 T cell subsets</b> | EMRA CD8+ T cells: cycle 3 vs baseline   | 8              | 0.648   | 12             | 0.243   |
|                                                | EMRA CD8+ T cells: cycle 6 vs baseline   | 8              | 0.760   | 12             | 0.132   |
|                                                | Total CD4 T cells: cycle 3 vs baseline   | 14             | 0.977   | 17             | 0.593   |
|                                                | Total CD4 T cells: cycle 6 vs baseline   | 14             | 0.040   | 17             | 0.001   |
|                                                | Naïve CD4+ T cells: cycle 3 vs baseline  | 14             | 0.977   | 17             | 0.968   |
| <b>S3A (ibrutinib):<br/>CD4 T cell subsets</b> | Naïve CD4+ T cells: cycle 6 vs baseline  | 14             | 0.720   | 17             | 0.009   |
|                                                | T-CM CD4+ cells: cycle 3 vs baseline     | 14             | 0.977   | 17             | 0.242   |

| Figure                                             | Comparison                                     | Initial Cohort |         | Updated Cohort |         |
|----------------------------------------------------|------------------------------------------------|----------------|---------|----------------|---------|
|                                                    |                                                | N              | P-value | N              | P-value |
|                                                    | T-CM CD4+ cells: cycle 6 vs baseline           | 14             | 0.019   | 17             | <.001   |
|                                                    | T-EM CD4+ cells: cycle 3 vs baseline           | 14             | 0.977   | 17             | 0.726   |
|                                                    | T-EM CD4+ cells: cycle 6 vs baseline           | 14             | 0.025   | 17             | 0.001   |
|                                                    | T-EMRA CD4+ cells: cycle 3 vs baseline         | 14             | 0.975   | 17             | 0.042   |
|                                                    | T-EMRA CD4+ cells: cycle 6 vs baseline         | 14             | 0.001   | 17             | <.001   |
|                                                    | T-EM CD4+ cells (CD27+): cycle 3 vs baseline   | 14             | 0.977   | 17             | 0.782   |
|                                                    | T-EM CD4+ cells (CD27+): cycle 6 vs baseline   | 14             | 0.007   | 17             | <.001   |
|                                                    | T-EM CD4+ cells (CD27-): cycle 3 vs baseline   | 14             | 0.977   | 17             | 0.471   |
|                                                    | T-EM CD4+ cells (CD27-): cycle 6 vs baseline   | 14             | 0.720   | 17             | 0.014   |
|                                                    | T-EMRA CD4+ cells (CD27+): cycle 3 vs baseline | 14             | 0.977   | 17             | 0.194   |
|                                                    | T-EMRA CD4+ cells (CD27+): cycle 6 vs baseline | 14             | 0.001   | 17             | <.001   |
|                                                    | T-EMRA CD4+ cells (CD27-): cycle 3 vs baseline | 14             | 0.977   | 17             | 0.743   |
|                                                    | T-EMRA CD4+ cells (CD27-): cycle 6 vs baseline | 14             | 0.977   | 17             | 0.793   |
| <b>S3B (acalabrutinib):<br/>CD4 T cell subsets</b> | Total CD4 T cells: cycle 3 vs baseline         | 8              | 0.339   | 10             | 0.018   |
|                                                    | Total CD4 T cells: cycle 6 vs baseline         | 8              | 0.562   | 10             | 0.099   |
|                                                    | Naïve CD4+ T cells: cycle 3 vs baseline        | 8              | 0.132   | 10             | 0.007   |
|                                                    | Naïve CD4+ T cells: cycle 6 vs baseline        | 8              | 0.079   | 10             | 0.002   |
|                                                    | T-CM CD4+ cells: cycle 3 vs baseline           | 8              | 0.213   | 10             | 0.002   |
|                                                    | T-CM CD4+ cells: cycle 6 vs baseline           | 8              | 0.040   | 10             | <.001   |
|                                                    | T-EM CD4+ cells: cycle 3 vs baseline           | 8              | 0.766   | 10             | 0.217   |
|                                                    | T-EM CD4+ cells: cycle 6 vs baseline           | 8              | 0.766   | 10             | 0.023   |
|                                                    | T-EMRA CD4+ cells: cycle 3 vs baseline         | 8              | 0.766   | 10             | 0.097   |
|                                                    | T-EMRA CD4+ cells: cycle 6 vs baseline         | 8              | 0.024   | 10             | <.001   |
|                                                    | T-EM CD4+ cells (CD27+): cycle 3 vs baseline   | 8              | 0.766   | 10             | 0.163   |
|                                                    | T-EM CD4+ cells (CD27+): cycle 6 vs baseline   | 8              | 0.416   | 10             | 0.005   |
|                                                    | T-EM CD4+ cells (CD27-): cycle 3 vs baseline   | 8              | 0.766   | 10             | 0.026   |
|                                                    | T-EM CD4+ cells (CD27-): cycle 6 vs baseline   | 8              | 0.911   | 10             | 0.158   |
| <b>S4A (ibrutinib):<br/>CTLA4</b>                  | T-EMRA CD4+ cells (CD27+): cycle 3 vs baseline | 8              | 0.766   | 10             | 0.078   |
|                                                    | T-EMRA CD4+ cells (CD27+): cycle 6 vs baseline | 8              | 0.017   | 10             | <.001   |
|                                                    | T-EMRA CD4+ cells (CD27-): cycle 3 vs baseline | 8              | 0.769   | 10             | 0.399   |
|                                                    | T-EMRA CD4+ cells (CD27-): cycle 6 vs baseline | 8              | 0.769   | 10             | 0.159   |
|                                                    | Total CD4 T cells: cycle 3 vs baseline         | 16             | 0.029   | 18             | 0.004   |
|                                                    | Total CD4 T cells: cycle 6 vs baseline         | 16             | 0.012   | 18             | 0.007   |
| <b>S4B (acalabrutinib):<br/>CTLA4</b>              | CD45RA- CD4 T cells: cycle 3 vs baseline       | 16             | 0.052   | 18             | 0.007   |
|                                                    | CD45RA- CD4 T cells: cycle 6 vs baseline       | 16             | 0.012   | 18             | 0.006   |
|                                                    | CD45RA+ CD4 T cells: cycle 3 vs baseline       | 16             | 0.059   | 18             | 0.027   |
|                                                    | CD45RA+ CD4 T cells: cycle 6 vs baseline       | 16             | 0.059   | 18             | 0.038   |
|                                                    | Total CD4 T cells: cycle 3 vs baseline         | 8              | 0.013   | 9              | 0.002   |
|                                                    | Total CD4 T cells: cycle 6 vs baseline         | 8              | 0.016   | 9              | 0.005   |
|                                                    | CD45RA- CD4 T cells: cycle 3 vs baseline       | 8              | 0.021   | 9              | 0.004   |
|                                                    | CD45RA- CD4 T cells: cycle 6 vs baseline       | 8              | 0.039   | 9              | 0.010   |
|                                                    | CD45RA+ CD4 T cells: cycle 3 vs baseline       | 8              | 0.018   | 9              | 0.002   |
|                                                    | CD45RA+ CD4 T cells: cycle 6 vs baseline       | 8              | 0.015   | 9              | 0.002   |
